# Supplementary material for: Comparative Evaluation of the Chemical Components and Anti-inflammatory Potential of Yellow- and Blue-Flowered Meconopsis Species: M. integrifolia and M. betonicifoliaCitation: To Be Added by Editorial Staff during Production
Source: Preprints.org preprint supplement (doi:10.20944/preprints202409.0683.v1), 2024-09-09
Supplement: Supplementary file 1 [file supplementary]

## Sheet: Sheet1
ionMode	feature	ret	mz	MW	adduct	NAME	FORMULA	SMILES	inchikeys	Pvals	FCs	MIE (yellow)	MBE (blue)	character	category
negative	M547_R249_21346	4.158	547.23	548.216	[M-H]-	"N-{2-[(6,7-dimethoxyisoquinolyl)methyl]-4,5-dimethoxyphenyl}(3,4,5-trimethoxyp henyl)carboxamide CollisionEnergy:102040"	C30H32N2O8	COc1cc(Cc2nccc3cc(OC)c(OC)cc23)c(N=C(O)c2cc(OC)c(OC)c(OC)c2)cc1OC	ZWOBSNLZDLBVGR-UHFFFAOYSA-N	0.0717227	0.012392	16550.4	261.258	common	Alkaloids
negative	M639_R36_25488	0.606	639.212	640.206	[M-H]-	Citbismine A	C35H32N2O10	COC1=C(OC)C2=C(C=C1)C(=O)C1=C(O)C(C3C(OC4=C3C3=C(C(O)=C4)C(=O)C4=C(N3C)C(O)=CC=C4)C(C)(C)O)=C(OC)C=C1N2	FTTSBKFANOKIKQ-UHFFFAOYSA-N	0.00453207	34.6321	152.754	16040.1	blue	Alkaloids
negative	M432_R476_16228	7.938	432.217	433.225	[M-H]-	Hericenone B	C27H31NO4	COC1=C(C\C=C(\C)CC(=O)C=C(C)C)C(O)=C2C(=O)N(CCC3=CC=CC=C3)CC2=C1	ZJTHOPGQZOXEJX-GRSHGNNSSA-N	0.683952	1.38229	684.712	1208.59	common	Alkaloids
positive	M160_R56_5681	0.931	160.075	177.079	[M+H-H2O]+	5_hydroxy_tryptophol	C10H11NO2	C1=CC2=C(C=C1O)C(=CN2)CCO	KQROHCSYOGBQGJ-UHFFFAOYSA-N	0.351149	22.4807	0.893851	1.87707	common	Alkaloids
positive	M180_R82_6683	1.365	180.099	179.095	[M+H]+	(R)-Salsolinol	C10H13NO2	CC1NCCC2=C1C=C(O)C(O)=C2	IBRKLUSXDYATLG-UHFFFAOYSA-N	0.742886	0.784577	669.383	2144.02	common	Alkaloids
positive	M180_R70_6687	1.159	180.101	179.095	[M+H]+	1-METHYL-6,7-DIHYDROXY-1,2,3,4-TETRAHYDROISOQUINOLINE - 70.0 eV	C10H13NO2	c12c(cc(c(c1)O)O)[C@@H](NCC2)C	IBRKLUSXDYATLG-LURJTMIESA-N	0.0651394	0.25482	3592.22	491.26	common	Alkaloids
positive	M188_R185_7156	3.076	188.067	205.074	[M+H-H2O]+	Spectral Match to DL-Indole-3-lactic acid from NIST14	C11H11NO3	C1=CC=C2C(=C1)C(=CN2)CC(C(=O)O)O	XGILAAMKEQUXLS-UHFFFAOYSA-N	0.00797246	0.178259	5135.42	833	yellow	Alkaloids
positive	M270_R468_12405	7.802	270.317	269.308	[M+H]+	Octadecylamine	C18H39N	CCCCCCCCCCCCCCCCCCN	REYJJPSVUYRZGE-UHFFFAOYSA-N	0.171703	0.633697	2078.67	1382.04	common	Alkaloids
positive	M272_R193_12603	3.223	272.093	271.084	[M+H]+	Pummeline	C15H13NO4	COC1=CC2=C(C(O)=C1)C(=O)C1=C(C=C(O)C=C1)N2C	ULFQWNWPHHCZAJ-UHFFFAOYSA-N	0.0650664	0.144384	2196.7	454.399	common	Alkaloids
positive	M272_R191_12615	3.178	272.126	271.121	[M+H]+	Higenamine	C16H17NO3	OC1=CC=C(C=C1)CC2NCCC3=CC(O)=C(O)C=C32	WZRCQWQRFZITDX-UHFFFAOYSA-N	0.273786	0.544867	3815.85	1168.25	common	Alkaloids
positive	M298_R201_15931	3.351	298.101	275.116	[M+Na]+	Dubinidine CollisionEnergy:102040	C15H17NO4	COc1c2c(nc3ccccc13)OC(C(C)(O)CO)C2	NETGEQWGGLFVRL-UHFFFAOYSA-N	0.0294957	0.259375	199.3	49.9969	yellow	Alkaloids
positive	M314_R206_17983	3.426	314.139	313.131	[M+H]+	Muricinine	C18H19NO4	COC1=C(O)C2=C(CC3NCCC4=CC(OC)=C(O)C2=C34)C=C1	POIRVLZGTSWEMG-UHFFFAOYSA-N	0.460479	1.69357	1421.61	1068.07	common	Alkaloids
positive	M316_R35_18241	0.589	316.139	315.129	[M+H]+	N'-Hydroxysaxitoxin	C10H17N7O5	ONC(=O)OCC1NC(=N)N2CCC(O)(O)C22NC(=N)NC12	AGUPJSLCNZPQMF-UHFFFAOYSA-N	0.0668688	0.451983	1920.57	926.044	common	Alkaloids
positive	M316_R388_18260	6.475	316.284	315.277	[M+H]+	Dehydrophytosphingosine (not validated, isomer of 1679)	C18H37NO3	OCC(N)C(O)C(O)CCCC=CCCCCCCCCC	CQKNELOTFUSOTP-UHFFFAOYSA-N	0.401799	0.493668	2782.77	3382.92	common	Alkaloids
positive	M318_R490_18436	8.163	318.076	317.069	[M+H]+	Lettowianthine	C19H11NO4	O=C1N2CCC3=CC4=C(OCO4)C4=C3C2=C(C1=O)C1=CC=CC=C41	FMLHJJVSHOCVAU-UHFFFAOYSA-N	0.976946	1.02002	11983.6	5197.49	common	Alkaloids
positive	M334_R504_19935	8.398	334.107	333.1	[M+H]+	Dihydrosanguinarine	C20H15NO4	CN1c2c3cc(OCO4)c4cc3ccc2c5ccc(OCO6)c6c5C1	CIUHLXZTZWTVFL-UHFFFAOYSA-N	0.990992	0.992459	48999.4	21272.8	common	Alkaloids
positive	M354_R261_22243	4.344	354.132	353.126	[M+H]+	Protopin	C20H19NO5	CN1CCC2=CC3=C(C=C2C(=O)CC4=C(C1)C5=C(C=C4)OCO5)OCO3	GPTFURBXHJWNHR-UHFFFAOYSA-N	0.224697	2.05643	28588.1	50499.4	common	Alkaloids
positive	M370_R258_24634	4.3	370.165	369.158	[M+H]+	Cryptopine CollisionEnergy:205060	C21H23NO5	COc1cc2c(cc1OC)C(=O)Cc1ccc3c(c1CN(C)CC2)OCO3	XPOJSWHIKCNLEQ-UHFFFAOYSA-N	0.0005344	4.81741	247.473	2958.48	blue	Alkaloids
positive	M525_R37_39962	0.615	525.114	502.126	[M+Na]+	"11-{4-[(4-bromophenyl)methoxy]phenyl}-3,3-dimethyl-2,3,4-trihydro-5H,10H,11H-b enzo[b]benzo[2,1-f]1,4-diazepin-1-one CollisionEnergy:205060"	C28H27BrN2O2	CC1(C)CC(=O)C2=C(C1)Nc1ccccc1NC2c1ccc(OCc2ccc(Br)cc2)cc1	NLQOUEKNYYLECS-UHFFFAOYSA-N	0.320994	79.1372	0	28.6556	common	Alkaloids
positive	M381_R38_25907	0.625	381.077	358.099	[M+Na]+	4-({4-[methyl(methylsulfonyl)amino]phenoxy}methyl)hydroquinolin-2-one CollisionEnergy:205060	C18H18N2O4S	CN(c1ccc(OCc2cc(O)nc3ccccc23)cc1)S(C)(=O)=O	RMLHZPKNJJJCAH-UHFFFAOYSA-N	0.277676	1.41781	36099.3	60354.3	common	Alkaloids
positive	M448_R184_32687	3.06	448.191	425.21	[M+Na]+	"2-[1-(4-methoxyphenyl)(1,2,3,4-tetrahydrobeta-carbolin-2-yl)]-N-(4-methylpheny l)acetamide CollisionEnergy:102040"	C27H27N3O2	COc1ccc(C2c3[nH]c4ccccc4c3CCN2CC(=O)Nc2ccc(C)cc2)cc1	SISSIOUECFLRBO-UHFFFAOYSA-N	0.377431	1.81466	734.467	1812.32	common	Alkaloids
positive	M466_R367_34403	6.113	466.128	443.146	[M+Na]+	2-[2-oxo-4-(pyrrolidinylcarbonyl)hydroquinolyl]-N-[3-(trifluoromethyl)phenyl]a cetamide CollisionEnergy:102040	C23H20F3N3O3	O=C(c1cc(=O)n(CC(O)=Nc2cccc(C(F)(F)F)c2)c2ccccc12)N1CCCC1	ZTVLXBNSRWGFMZ-UHFFFAOYSA-N	0.0967102	0.445274	2657.25	1178.97	common	Alkaloids
positive	M495_R361_36883	6.012	495.122	472.142	[M+Na]+	"2-[4-(2H-benzo[3,4-d]1,3-dioxolen-5-yl)-5-(3,4,5-trimethoxyphenyl)(1,2,4-triaz ol-3-ylthio)]-N,N-dimethylacetamide CollisionEnergy:102040"	C22H24N4O6S	COc1cc(-c2nnc(SCC(=O)N(C)C)n2-c2ccc3c(c2)OCO3)cc(OC)c1OC	GDPOIUMOSWQWJA-UHFFFAOYSA-N	0.0341686	2.16787	5877.26	14939.9	blue	Alkaloids
positive	M502_R241_37544	4.022	502.199	479.221	[M+Na]+	"N-[4-(methylethyl)phenyl]-2-[2-oxo-4-(2-1,2,3,4-tetrahydroisoquinolylcarbonyl) hydroquinolyl]acetamide CollisionEnergy:102040"	C30H29N3O3	CC(C)c1ccc(NC(=O)Cn2c(=O)cc(C(=O)N3CCc4ccccc4C3)c3ccccc32)cc1	CNYRVOURKYIGPI-UHFFFAOYSA-N	0.123965	29.2623	107.72	4801.62	common	Alkaloids
positive	M504_R200_37782	3.336	504.184	481.213	[M+Na]+	2-{1-[(4-chlorophenyl)carbonyl]-5-methoxy-2-methylindol-3-yl}-N-(3-piperidylpr opyl)acetamide CollisionEnergy:102040	C27H32ClN3O3	COc1ccc2c(c1)c(CC(O)=NCCCN1CCCCC1)c(C)n2C(=O)c1ccc(Cl)cc1	NJXNGTJLEUQWSF-UHFFFAOYSA-N	0.097163	7.91298	1356.09	10904.2	common	Alkaloids
positive	M609_R540_48891	8.992	609.268	608.252	[M+H]+	Somniferine	C36H36N2O7	[H][C@]1(C[C@@]23[C@H]4OC5=C2C(C[C@@H](N1C)C3=CC=C4OC)=CC=C5OC)C1=C[C@@]2(O)[C@H]3CC4=CC=C(O)C5=C4[C@@]2(CCN3C)[C@@H](O5)C1=O	JQGBUIZIHWUPHT-CSVNJIPGSA-N	0.00853445	0.0680309	8007.68	596.247	yellow	Alkaloids
positive	M623_R540_50490	8.996	623.252	622.268	[M+H]+	O-Methylsomniferine	C37H38N2O7	COC1=CC=C2[C@H]3CC4=CC=C(OC)C5=C4[C@@]2(C[C@H](N3C)C2=C[C@@]3(O)[C@H]4CC6=CC=C(OC)C7=C6[C@@]3(CCN4C)[C@@H](O7)C2=O)[C@H]1O5	ZBLRQFTWSKSLFD-LKNBYEBDSA-N	0.00701763	0.0713365	14131	871.394	yellow	Alkaloids
positive	M364_R297_23862	4.948	364.283	363.277	[M+H]+	(±)-8(9)-EET ethanolamide	C22H37NO3	CCCCC\C=C/C\C=C/CC1OC1C\C=C/CCCC(=O)NCCO	BXHPMUQFGGSDAK-TYAUOURKSA-N	0.00735883	2.67812	1514.98	4792.39	blue	Alkaloids
positive	M137_R53_4514	0.878	137.059	136.052	[M+H]+	phenylacetate	C8H8O2	OC(=O)CC1=CC=CC=C1	WLJVXDMOQOGPHL-UHFFFAOYSA-N	0.682815	1.24452	1254.37	1406	common	Benzene and substituted derivatives
positive	M137_R39_4522	0.643	137.06	136.052	[M+H]+	Benzyl formate	C8H8O2	O=COCC1=CC=CC=C1	UYWQUFXKFGHYNT-UHFFFAOYSA-N	0.597371	0.718446	976.333	1056.45	common	Benzene and substituted derivatives
positive	M137_R35_4525	0.583	137.061	136.052	[M+H]+	2-Methylbenzoic acid	C8H8O2	CC1=C(C=CC=C1)C(O)=O	ZWLPBLYKEWSWPD-UHFFFAOYSA-N	0.530095	0.672522	1010.87	1035.54	common	Benzene and substituted derivatives
positive	M332_R283_19724	4.715	332.086	309.1	[M+Na]+	"3-[2-(3,4-dimethoxyphenyl)-2-oxoethylidene]-1H-benzo[d]azolidin-2-one CollisionEnergy:102040"	C18H15NO4	COc1ccc(C(=O)C=C2C(O)=Nc3ccccc32)cc1OC	SVEZBECVWLMTGK-UHFFFAOYSA-N	0.927196	1.05315	49840.7	28446.1	common	Benzene and substituted derivatives
positive	M365_R494_24022	8.226	365.266	364.261	[M+H]+	Methyl-[10]-gingerol	C22H36O4	CCCCCCCCCC(O)CC(=O)CCC1=CC=C(OC)C(OC)=C1	YCMYNWSNMYONMK-UHFFFAOYSA-N	0.987223	0.992285	1472.15	1138.51	common	Benzene and substituted derivatives
positive	M181_R199_6744	3.317	181.049	180.042	[M+H]+	3-Hydroxyphenylpyruvic acid	C9H8O4	OC(=O)C(=O)CC1=CC(O)=CC=C1	PNYWALDMLUDDTA-UHFFFAOYSA-N	0.0122408	8.41276	14.6396	119.499	blue	Benzene and substituted derivatives
positive	M627_R433_50923	7.22	627.278	604.274	[M+Na]+	"N-[(3,4,5-trimethoxyphenyl)carbonylamino]-N'-[(3,4,5-trimethoxyphenyl)carbonyl amino]nonane-1,9-diamide CollisionEnergy:205060"	C29H40N4O10	COc1cc(C(O)=NN=C(O)CCCCCCCC(O)=NN=C(O)c2cc(OC)c(OC)c(OC)c2)cc(OC)c1OC	ARBSLXZFFDJTKI-UHFFFAOYSA-N	0.020442	0.0416384	10320.5	417.128	yellow	Benzene and substituted derivatives
negative	M315_R179_10928	2.978	315.103	462.174	[M-C6H10O4-H]-	(2S,3R,4R,5R,6S)-2-[(2R,3R,4S,5R,6R)-2-[2-(3,4-dihydroxyphenyl)ethoxy]-3,5-dihydroxy-6-(hydroxymethyl)oxan-4-yl]oxy-6-methyloxane-3,4,5-triol	C20H30O12	OC1=CC=C(C=C1O)CCOC2OC(CO)C(O)C(OC3OC(C)C(O)C(O)C3O)C2O	DORPKYRPJIIARM-GYAWPQPFSA-N	0.261353	1.60166	29238.2	69243	common	Carbohydrates
negative	M315_R36_10929	0.593	315.103	270.11	[M+HCOOH-H]-	11,22-dimethyl (6E,17E)-3,14-dioxo-8,19-bis({[(2S,3R,4S,5S,6R)-3,4,5-trihydroxy-6-(hydroxymethyl)oxan-2-yl]oxy})-4,9,15,20-tetraoxatricyclo[16.4.0.0?,¹²]docosa-6,10,17,21-tetraene-11,22-dicarboxylate	C13H18O6	OCC1OC(OCC=2C=CC=CC2)C(O)C(O)C1O	GKHCBYYBLTXYEV-UJPOAAIJSA-N	0.227081	0.425858	1299.08	1071.83	common	Carbohydrates
negative	M325_R209_11328	3.489	325.087	326.1	[M-H]-	(E)-3-[4-[(2S,3R,4S,5S,6R)-3,4,5-trihydroxy-6-(hydroxymethyl)oxan-2-yl]oxyphenyl]prop-2-enoic acid	C15H18O8	O=C(O)C=CC1=CC=C(OC2OC(CO)C(O)C(O)C2O)C=C1	LJFYQZQUAULRDF-FDGSXQGBSA-N	0.0305511	3.0605	2405.74	19824.4	blue	Carbohydrates
negative	M341_R46_12134	0.76	341.101	342.116	[M-H]-	Sucrose	C12H22O11	OC[C@H]1O[C@@](CO)(O[C@H]2O[C@H](CO)[C@@H](O)[C@H](O)[C@H]2O)[C@@H](O)[C@@H]1O	CZMRCDWAGMRECN-UGDNZRGBSA-N	0.39968	1.52114	3608.02	10509.7	common	Carbohydrates
negative	M377_R34_13941	0.565	377.077	342.116	[M+Cl]-	Massbank:RP023212 Gentiobiose|(2R,3R,4S,5S,6R)-6-[[(2R,3R,4S,5S,6R)-3,4,5-trihydroxy-6-(hydroxymethyl)oxan-2-yl]oxymethyl]oxane-2,3,4,5-tetrol	C12H22O11	O(C[C@H]1O[C@@H](O)[C@H](O)[C@@H](O)[C@@H]1O)[C@@H]2O[C@@H]([C@@H](O)[C@H](O)[C@H]2O)CO	DLRVVLDZNNYCBX-LIZSDCNHSA-N	0.178229	0.363745	36644.5	16789.9	common	Carbohydrates
negative	M377_R38_13943	0.638	377.078	378.095	[M-H]-	4-hydroxy-5-[(2S,3R,4S,5S,6R)-3,4,5-trihydroxy-6-(hydroxymethyl)oxan-2-yl]oxy-1H-benzo[f][2]benzofuran-3-one	C18H18O9	O=C1OCC2=CC=3C=CC=C(OC4OC(CO)C(O)C(O)C4O)C3C(O)=C12	SGQJDTLFQCDZGS-UQEKQVNISA-N	0.453419	0.652403	36438.7	23064.4	common	Carbohydrates
negative	M387_R46_14392	0.759	387.105	342.116	[M+HCOOH-H]-	Trehalose	C12H22O11	OC[C@H]1O[C@H](O[C@H]2O[C@H](CO)[C@@H](O)[C@H](O)[C@H]2O)[C@H](O)[C@@H](O)[C@@H]1O	HDTRYLNUVZCQOY-LIZSDCNHSA-N	0.646449	1.25605	1263.39	2788.18	common	Carbohydrates
negative	M387_R34_14393	0.575	387.109	342.116	[M+HCOOH-H]-	2-alpha-Mannobiose	C12H22O11	OCC1OC(O)C(OC2OC(CO)C(O)C(O)C2O)C(O)C1O	HIWPGCMGAMJNRG-VXSGSMIHSA-N	0.0364061	2.22434	3477.66	10317	blue	Carbohydrates
negative	M415_R223_15453	3.711	415.15	416.168	[M-H]-	(2R,3S,4S,5R,6R)-5-[(2S,3R,4R)-3,4-dihydroxy-4-(hydroxymethyl)oxolan-2-yl]oxy-2-(hydroxymethyl)-6-(2-phenylethoxy)oxane-3,4-diol	C19H28O10	OC[C@H]1O[C@@H](OCCC2=CC=CC=C2)[C@H](O[C@@H]3OC[C@](O)(CO)[C@H]3O)[C@@H](O)[C@@H]1O	UWKRNCNWJVCHGZ-DERWZFJFSA-N	0.0260211	0.219327	2558.26	546.687	yellow	Carbohydrates
negative	M503_R200_19438	3.327	503.133	522.137	[M-H2O-H]-	salviaflaside	C24H26O13	O=C(O)C(OC(=O)C=CC1=CC=C(O)C(OC2OC(CO)C(O)C(O)C2O)=C1)CC3=CC=C(O)C(O)=C3	DSMWJDJWYGMEBO-PRFRQLEPSA-N	0.0017742	11.6974	886.814	11176.2	blue	Carbohydrates
negative	M503_R52_19446	0.865	503.15	504.169	[M-H]-	RAFFINOSE	C18H32O16	C([C@@H]1[C@@H]([C@@H]([C@H](C(OC[C@@H]2[C@H]([C@@H]([C@H](C(O2)O[C@@]3(CO)[C@H]([C@@H]([C@@H](CO)O3)O)O)O)O)O)O1)O)O)O)O	MUPFEKGTMRGPLJ-BQCSWRFHSA-N	0.660241	1.24738	11286.7	36416.4	common	Carbohydrates
negative	M539_R36_21032	0.592	539.128	504.169	[M+Cl]-	RAFFINOSE CollisionEnergy:102040	C18H32O16	OC[C@H]1O[C@@](CO)(O[C@H]2O[C@H](CO[C@H]3O[C@H](CO)[C@H](O)[C@H](O)[C@H]3O)[C@@H](O)[C@H](O)[C@H]2O)[C@@H](O)[C@@H]1O	MUPFEKGTMRGPLJ-ZQSKZDJDSA-N	0.342453	0.365572	11032.5	28276.3	common	Carbohydrates
negative	M539_R39_21033	0.645	539.132	504.169	[M+Cl]-	D(+)-Melezitose	C18H32O16	O1[C@H](CO)[C@@H](O)[C@H](O)[C@@H](O)[C@H]1O[C@@]3(O[C@@H]([C@@H](O)[C@@H]3O[C@H]2O[C@H](CO)[C@@H](O)[C@H](O)[C@H]2O)CO)CO	QWIZNVHXZXRPDR-WSCXOGSTSA-N	0.359633	0.362505	6475.16	11461.9	common	Carbohydrates
negative	M555_R503_21716	8.381	555.275	556.297	[M-H]-	Dronedarone	C31H44N2O5S	CCCCc1c(c2cc(ccc2o1)NS(=O)(=O)C)C(=O)c3ccc(cc3)OCCCN(CCCC)CCCC	ZQTNQVWKHCQYLQ-UHFFFAOYSA-N	0.0839469	0.18563	3801.54	269.338	common	Carbohydrates
positive	M121_R53_3673	0.878	121.064	120.058	[M+H]+	Acetophenone	C8H8O	CC(=O)C1=CC=CC=C1	KWOLFJPFCHCOCG-UHFFFAOYSA-N	0.287165	5.62645	8.35904	14.6094	common	Carbohydrates
positive	M277_R458_13224	7.638	277.183	254.188	[M+Na]+	NCGC00381166-01_C15H26O3_	C15H26O3	CC/1=C/CC2C(C)(CO)CCCC2(CO)C1CO	FUVVLIGUEPFKDK-UHFFFAOYSA-N	0.0481824	0.0830029	74.3778	6.07969	yellow	Carbohydrates
positive	M334_R178_19943	2.972	334.15	316.116	[M+NH4]+	Hydroxytyrosol 4'-O-glucoside	C14H20O8	OCCC1=CC(O)=C(OC2OC(CO)C(O)C(O)C2O)C=C1	JVOQYXVFJHETKK-UHFFFAOYSA-N	0.334834	0.58088	10058.5	9468.33	common	Carbohydrates
positive	M351_R357_21894	5.942	351.253	318.219	[M+CH3OH+H]+	(4E,8E)-7-hydroxy-10-(hydroxymethyl)-4,8,11,15-tetramethylbicyclo[11.2.0]pentadeca-4,8,14-trien-6-one	C20H30O3	CC(CC1C=C(C)C1CC/C(/C)=C/C1=O)C(CO)/C=C(\C)/C1O	QQYQHZUMKAJTAA-UHFFFAOYSA-N	0.769767	0.788176	348.506	1981.57	common	Carbohydrates
positive	M522_R51_39590	0.856	522.201	504.169	[M+NH4]+	Maltotriose	C18H32O16	OC[C@H]1O[C@H](O[C@H]2[C@H](O)[C@@H](O)[C@@H](O[C@H]3[C@H](O)[C@@H](O)C(O)O[C@@H]3CO)O[C@@H]2CO)[C@H](O)[C@@H](O)[C@@H]1O	FYGDTMLNYKFZSV-DZOUCCHMSA-N	0.0202647	2.52858	675.844	2843.77	blue	Carbohydrates
positive	M348_R202_21556	3.362	348.166	330.131	[M+NH4]+	NCGC00169449-02_C15H22O8_beta-D-Glucopyranoside, 4-(2-hydroxyethyl)-2-methoxyphenyl	C15H22O8	COC1=C(O[C@@H]2O[C@H](CO)[C@@H](O)[C@H](O)[C@H]2O)C=CC(=C1)CCO	ZZDVZVBAZHPHLY-UXXRCYHCSA-N	0.152721	0.0370924	605.494	41.2899	common	Carbohydrates
positive	M639_R554_52178	9.24	639.279	616.3	[M+Na]+	"1,2,3,4,5,6,7,8,9,10-decahydrobenzo[a][12]annulen-12-yl-N-[6-(1,2,3,4,5,6,7,8, 9,10-decahydrobenzo[a][12]annulen-12-ylcarbonylamino)hexyl]carboxamide CollisionEnergy:205060"	C32H44N2O10	OC(=NCCCCCCN=C(O)c1ccc2c(c1)OCCOCCOCCO2)c1ccc2c(c1)OCCOCCOCCO2	SYUYSYDIIRQOOG-UHFFFAOYSA-N	0.0644552	0.020235	6951.29	176.402	common	Carbohydrates
positive	M850_R253_67067	4.211	850.437	827.467	[M+Na]+	josamycin CollisionEnergy:102040	C42H69NO15	COC1C(OC(C)=O)CC(=O)OC(C)CC=CC=CC(O)C(C)CC(CC=O)C1OC1OC(C)C(OC2CC(C)(O)C(OC(=O)CC(C)C)C(C)O2)C(N(C)C)C1O	XJSFLOJWULLJQS-UHFFFAOYSA-N	0.0798513	0.404982	159.068	50.7414	common	Carbohydrates
positive	M861_R405_67729	6.745	861.398	838.399	[M+Na]+	4-[(7R,11S,14S,16R)-14-[(4-methoxy-6-methyl-5-{[(2S,3R,4S,5S,6R)-3,4,5-trihydroxy-6-({[(2R,3R,4S,5S,6R)-3,4,5-trihydroxy-6-(hydroxymethyl)oxan-2-yl]oxy}methyl)oxan-2-yl]oxy}oxan-2-yl)oxy]-7,11-dimethyl-2-oxapentacyclo[8.8.0.0¹,³.0³,⁷.0¹¹,¹⁶]octadec-5-en-6-yl]-2,5-dihydrofuran-2-one	C42H62O17	O=C1OCC(=C1)C2=CCC34OC54CCC6CC(OC7OC(C)C(OC8OC(COC9OC(CO)C(O)C(O)C9O)C(O)C(O)C8O)C(OC)C7)CCC6(C)C5CCC23C	DVFXEUYOOYUTOA-DYCWBZJYSA-N	0.00958458	3.37281	738.471	2635.75	blue	Carbohydrates
positive	M295_R489_15668	8.152	295.226	294.219	[M+H]+	(9S,10E,12Z,15Z)-9-Hydroxy-10,12,15-octadecatrienoic acid	C18H30O3	CC\C=C\C\C=C\C=C\C(O)CCCCCCCC(O)=O	RIGGEAZDTKMXSI-JPAZTHTMSA-N	0.349805	0.68896	1109.41	656.631	common	Carbohydrates
positive	M496_R175_36979	2.922	496.203	478.169	[M+NH4]+	3,4-Dihydroxyphenylethanol-4-diglucoside	C20H30O13	OCCC1=CC(O)=C(O[C@@H]2O[C@H](CO[C@@H]3O[C@H](CO)[C@@H](O)[C@H](O)[C@H]3O)[C@@H](O)[C@H](O)[C@H]2O)C=C1	GSBZTKMXIZXGEF-XSVWGIRKSA-N	0.188505	0.265499	3298.05	1667.74	common	Carbohydrates
positive	M887_R850_69302	14.173	886.564	885.524	[M+H]+	Emamectin	C49H75NO13	C/C([C@](O[C@H]1C[C@H](OC)[C@](O[C@@H]2O[C@H](C)[C@@H](NC)[C@H](OC)C2)([H])[C@H](C)O1)([H])[C@@H](C)/C=C/C=C(CO3)/[C@@]([C@@]3([H])[C@H](O)C(C)=C4)(O)[C@@H]4C(O5)=O)=C\C[C@@H]6C[C@H]5C[C@]7(C=C[C@H](C)[C@]([C@@H](C)CC)([H])O7)O6	CXEGAUYXQAKHKJ-FYOMLGFFSA-N	0.47102	0.590775	2463.67	1895.44	common	Carbohydrates
negative	M175_R202_5247	3.367	175.06	176.068	[M-H]-	isopropylmalic acid - 30.0 eV	C7H12O5	CC(C)C(CC(=O)O)(C(=O)O)O	BITYXLXUCSKTJS-UHFFFAOYSA-N	0.51222	0.456499	2581.29	3993.37	common	Fatty Acyls
negative	M255_R607_8236	10.112	255.231	256.24	[M-H]-	Ethyl tetradecanoate	C16H32O2	CCCCCCCCCCCCCC(=O)OCC	MMKRHZKQPFCLLS-UHFFFAOYSA-N	0.0271586	0.328725	7762.33	2247.04	yellow	Fatty Acyls
negative	M277_R456_8892	7.599	277.213	278.225	[M-H]-	γ-Linolenic acid	C18H30O2	CCCCC\C=C/C\C=C/C\C=C/CCCCC(O)=O	VZCCETWTMQHEPK-QNEBEIHSSA-N	0.00244677	3.73659	1493.35	5563.03	blue	Fatty Acyls
negative	M277_R555_8897	9.255	277.216	278.225	[M-H]-	Pinolenic acid - 10eV	C18H30O2	CCCCC/C=C\C/C=C\CC/C=C\CCCC(=O)O	HXQHFNIKBKZGRP-URPRIDOGSA-N	0.0178566	0.321265	62383.1	9277.98	yellow	Fatty Acyls
negative	M283_R646_9193	10.775	283.272	284.272	[M-H]-	stearate	C18H36O2	CCCCCCCCCCCCCCCCCC(O)=O	QIQXTHQIDYTFRH-UHFFFAOYSA-N	0.0691151	0.607665	1750.41	701.795	common	Fatty Acyls
negative	M291_R460_9611	7.669	291.195	292.204	[M-H]-	Massbank:PR309075 FA 18:4+1O	C18H28O3	O=C(O)CCCCCCCC1C(=O)C=CC1(CC=CCC)	IYEHRWJNUWAXAD-UHFFFAOYSA-N	0.0341254	0.30072	20774.5	6195.28	yellow	Fatty Acyls
negative	M293_R453_9713	7.553	293.211	294.219	[M-H]-	Massbank:IA000196 13-HOTrE	C18H30O3	CC\C=C/CC(O)\C=C\C=C/CCCCCCCC(O)=O	KLLGGGQNRTVBSU-JDTPQGGVSA-N	0.0243737	0.319229	65939.6	19522.6	yellow	Fatty Acyls
negative	M295_R476_9826	7.936	295.227	296.235	[M-H]-	9-HODE	C18H32O3	CCCCC\C=C/C=C/C(O)CCCCCCCC(O)=O	NPDSHTNEKLQQIJ-ZJHFMPGASA-N	0.0648121	0.354307	19899.2	5171.24	common	Fatty Acyls
negative	M311_R400_10719	6.673	311.222	312.23	[M-H]-	9-Hpode	C18H32O4	CCCCCC=CC=CC(CCCCCCCC(O)=O)OO	JGUNZIWGNMQSBM-UHFFFAOYSA-N	0.0311442	0.0960491	3385.63	342.821	yellow	Fatty Acyls
negative	M311_R427_10723	7.109	311.231	330.241	[M-H2O-H]-	(9S,10E,12S,13S)-9,12,13-Trihydroxy-10-octadecenoic acid	C18H34O5	CCCCCC(O)C(O)\C=C\C(O)CCCCCCCC(O)=O	MDIUMSLCYIJBQC-BUHFOSPRSA-N	0.0945223	0.397599	4311.83	1359.64	common	Fatty Acyls
negative	M325_R200_11327	3.34	325.085	472.137	[M-C6H10O4-H]-	3-phenyl-2-[(2S,3R,4S,5S,6R)-3,4,5-trihydroxy-6-[[(E)-3-(4-hydroxyphenyl)prop-2-enoyl]oxymethyl]oxan-2-yl]oxyprop-2-enoic acid	C24H24O10	O[C@H]1[C@H](O)[C@@H](COC(=O)\C=C\C2=CC=C(O)C=C2)O[C@@H](OC(=CC3=CC=CC=C3)C(O)=O)[C@@H]1O	OFPMGMVAOWDSRN-VNEUDPKJSA-N	0.39042	1.73299	412.728	1761.84	common	Fatty Acyls
negative	M327_R325_11457	5.412	327.217	328.225	[M-H]-	(10E,15E)-9,12,13-trihydroxyoctadeca-10,15-dienoic acid	C18H32O5	CC/C=C/CC(C(/C=C/C(CCCCCCCC(O)=O)O)O)O	MKYUCBXUUSZMQB-UHFFFAOYSA-N	0.0156922	0.206173	32244.1	5603.79	yellow	Fatty Acyls
negative	M329_R339_11551	5.657	329.229	330.241	[M-H]-	(Z)-9,12,13-trihydroxyoctadec-15-enoic acid	C18H34O5	O=C(O)CCCCCCCC(O)CCC(O)C(O)CC=CCC	DNWUYCUUEGGVPR-CLTKARDFSA-N	0.161332	0.514098	12493	4934.61	common	Fatty Acyls
negative	M415_R261_15458	4.353	415.204	370.199	[M+HCOOH-H]-	Massbank:PR308947 Hexose + C13H19O (isomer of 1061)	C19H30O7	O=C2C=C(C)C(C=CC(OC1OC(CO)C(O)C(O)C1(O))C)C(C)(C)C2	SZOPSAFLRCYJCX-UHFFFAOYSA-N	0.00308805	6.81532	613.382	3489.83	blue	Fatty Acyls
negative	M275_R451_8807	7.517	275.201	276.209	[M-H]-	4,8,12,15-Octadecatetraenoic acid	C18H28O2	CC\C=C/C\C=C/CC\C=C\CC\C=C\CCC(O)=O	SIVLURJESSFFDP-FLVFHSTKSA-N	0.0477676	0.459616	2863.9	1126.28	yellow	Fatty Acyls
negative	M293_R484_9716	8.07	293.211	294.219	[M-H]-	12,13-Epoxy-9,15-octadecadienoic acid	C18H30O3	CC\C=C/CC1OC1C\C=C\CCCCCCCC(O)=O	BKKGUKSHPCTUGE-GSRSKSEFSA-N	0.0353105	0.270674	8877.76	2806.43	yellow	Fatty Acyls
negative	M311_R434_10718	7.231	311.221	312.23	[M-H]-	(±)-(E)-13-Hydroxy-10-oxo-11-octadecenoic acid	C18H32O4	CCCCCC(O)\C=C\C(=O)CCCCCCCCC(O)=O	CZGIUGHMJZYXNX-CCEZHUSRSA-N	0.114856	0.360491	3850.2	1565.83	common	Fatty Acyls
negative	M433_R223_16272	3.711	433.208	388.21	[M+HCOOH-H]-	5a,6a-Epoxy-7E-megastigmene-3b,9R-diol 9-glucoside	C19H32O8	CC(OC1OC(CO)C(O)C(O)C1O)\C=C\C12OC1(C)CC(O)CC2(C)C	RIUMIKAUMHZQMP-AATRIKPKSA-N	0.00682098	1.78716	2463.13	4362.78	blue	Fatty Acyls
positive	M261_R423_11630	7.045	261.218	278.225	[M+H-H2O]+	alpha-Eleostearic acid	C18H30O2	CCCC\C=C\C=C/C=C/CCCCCCCC(O)=O	CUXYLFPMQMFGPL-MRZTUZPCSA-N	0.0762564	1.85591	575.947	1369.51	common	Fatty Acyls
positive	M353_R451_22122	7.509	353.27	352.261	[M+H]+	MG(0:0/18:3(9Z,12Z,15Z)/0:0)	C21H36O4	CCC=CCC=CCC=CCCCCCCCC(=O)OC(CO)CO	ZCCLDKGWJIREQF-UHFFFAOYSA-N	0.194178	1.4014	3138.08	4897.41	common	Fatty Acyls
positive	M263_R556_11782	9.261	263.235	280.24	[M+H-H2O]+	9E,11E-Octadecadienoic acid	C18H32O2	CCCCCC\C=C\C=C\CCCCCCCC(O)=O	JBYXPOFIGCOSSB-XBLVEGMJSA-N	0.0706323	2.38082	1484.79	3056.5	common	Fatty Acyls
positive	M277_R456_13233	7.604	277.215	294.219	[M+H-H2O]+	Spectral Match to 13S-Hydroxy-9Z,11E,15Z-octadecatrienoic acid from NIST14	C18H30O3	CC/C=C\C[C@@H](/C=C/C=C\CCCCCCCC(=O)O)O	KLLGGGQNRTVBSU-FQSPHKRJSA-N	0.0219657	0.170745	35188.4	5813.29	yellow	Fatty Acyls
positive	M279_R557_13520	9.279	279.23	296.235	[M+H-H2O]+	Spectral Match to 9(10)-EpOME from NIST14	C18H32O3	CCCCC/C=C\CC1C(O1)CCCCCCCC(=O)O	FBUKMFOXMZRGRB-YFHOEESVSA-N	0.429847	0.77586	24873.6	13241.2	common	Fatty Acyls
positive	M282_R581_13985	9.69	282.281	281.272	[M+H]+	Spectral Match to 9-Octadecenamide, (Z)- from NIST14	C18H35NO	CCCCCCCC/C=C\CCCCCCCC(=O)N	FATBGEAMYMYZAF-KTKRTIGZSA-N	0.244786	1.43155	1622.76	3124.04	common	Fatty Acyls
positive	M353_R458_22120	7.631	353.267	352.261	[M+H]+	Glyceryl linolenate_major	C21H36O4	CCC=CCC=CCC=CCCCCCCCC(=O)OCC(O)CO	GGJRAQULURVTAJ-PDBXOOCHSA-N	0.0024315	5.37538	5236.88	42253	blue	Fatty Acyls
positive	M295_R495_15672	8.255	295.226	294.219	[M+H]+	Spectral Match to 9-Oxo-10E,12Z-octadecadienoic acid from NIST14	C18H30O3	CCCCC/C=C\C=C\C(=O)CCCCCCCC(=O)O	LUZSWWYKKLTDHU-ZJHFMPGASA-N	0.28461	0.566382	1361.77	962.295	common	Fatty Acyls
positive	M305_R544_16827	9.067	305.249	304.24	[M+H]+	Spectral Match to Stearidonic acid ethyl ester from NIST14	C20H32O2	CCC=CCC=CCC=CCC=CCCCCC(=O)OCC	RIDOSNBWMUADGT-UHFFFAOYSA-N	0.0749011	0.080421	45107.4	3182.88	common	Fatty Acyls
positive	M307_R566_17079	9.426	307.263	306.256	[M+H]+	Spectral Match to 9Z,11E,13E-Octadecatrienoic acid ethyl ester from NIST14	C20H34O2	CCCC/C=C/C=C\C=C/CCCCCCCC(=O)OCC	YVGCHYVFHLTZIM-JZEGGRRDSA-N	0.163408	0.203756	4827.98	1179.59	common	Fatty Acyls
positive	M261_R405_11633	6.746	261.219	278.225	[M+H-H2O]+	Calendic acid	C18H30O2	CCCCC\C=C/C=C/C=C/CCCCCCC(O)=O	DQGMPXYVZZCNDQ-KBPWROHVSA-N	0.0805937	1.82273	71.766	182.998	common	Fatty Acyls
positive	M571_R852_45042	14.206	571.471	588.475	[M+H-H2O]+	Tripoxyrollin	C37H64O5	CCCCCCCCCCC1OC1CCC1OC1CCC1OC1CCCCCCCCCCCCC1=CC(C)OC1=O	KCYRZEFVHDREPK-UHFFFAOYSA-N	0.457428	1.63082	1564.02	1723.52	common	Fatty Acyls
positive	M576_R859_45454	14.314	575.505	592.507	[M+H-H2O]+	cis-Uvariamicin IB	C37H68O5	CCCCCCCCCCCCCCC(O)C1CCC(O1)C(O)CCCCCCCCCCCCC1=CC(C)OC1=O	UXILAQXAZFVOFT-UHFFFAOYSA-N	0.232885	0.487055	2060.84	546.983	common	Fatty Acyls
negative	M269_R328_8611	5.471	269.053	270.053	[M-H]-	Apigenin	C15H10O5	OC1=CC=C(C=C1)C1=CC(=O)C2=C(O)C=C(O)C=C2O1	KZNIFHPLKGYRTM-UHFFFAOYSA-N	0.58156	1.19981	6075.75	5957.25	common	Flavonoids
negative	M285_R303_9292	5.057	285.038	286.048	[M-H]-	Luteolin	C15H10O6	C1=CC(=C(C=C1C2=CC(=O)C3=C(C=C(C=C3O2)O)O)O)O	IQPNAANSBPBGFQ-UHFFFAOYSA-N	0.159547	0.734712	107038	75057.5	common	Flavonoids
negative	M287_R299_9392	4.978	287.05	288.063	[M-H]-	Massbank:PR306162 Eriodictyol	C15H12O6	OC1=CC(O)=C2C(=O)CC(OC2=C1)C1=CC(O)=C(O)C=C1	SBHXYTNGIZCORC-UHFFFAOYSA-N	0.00677103	3.19161	4877.59	13656.1	blue	Flavonoids
negative	M271_R361_8682	6.018	271.02	272.024	[M-H]-	3-(2-chlorophenyl)-7-hydroxychromen-2-one CollisionEnergy:102040	C15H9ClO3	O=c1oc2cc(O)ccc2cc1-c1ccccc1Cl	BGMJHLCMSVMDLM-UHFFFAOYSA-N	0.00599224	0.0687159	629.411	44.5033	yellow	Flavonoids
negative	M301_R305_10166	5.077	301.036	302.043	[M-H]-	Tricetin	C15H10O7	OC1=CC2=C(C(O)=C1)C(=O)C=C(O2)C1=CC(O)=C(O)C(O)=C1	ARSRJFRKVXALTF-UHFFFAOYSA-N	0.00256287	0.307537	9530.54	3434.19	yellow	Flavonoids
negative	M303_R258_10275	4.294	303.051	304.058	[M-H]-	taxifolin	C15H12O7	O=C1C=2C(O)=CC(O)=CC2OC(C3=CC=C(O)C(O)=C3)C1O	CXQWRCVTCMQVQX-UHFFFAOYSA-N	0.00563936	0.198515	80133.4	17252.5	yellow	Flavonoids
negative	M329_R332_11532	5.528	329.075	506.106	[M-C6H8O6-H]-	Massbank:PR305686 Quercetin-3-O-glucosyl-6''-acetate	C23H22O13	CC(=O)OCC1OC(OC2=C(OC3=CC(O)=CC(O)=C3C2=O)C2=CC(O)=C(O)C=C2)C(O)C(O)C1O	IGLUNMMNDNWZOA-UHFFFAOYSA-N	0.000858246	3.28685	1408.36	5870.29	blue	Flavonoids
negative	M433_R260_16260	4.338	433.069	434.085	[M-H]-	Reynoutrin	C20H18O11	OC1=C(O)C=C(C2=C(O[C@H]3OC[C@H](O)[C@@H](O)[C@@H]3O)C(C4=C(O)C=C(O)C=C4O2)=O)C=C1	PZZRDJXEMZMZFD-ODPGBAFUSA-N	0.000320053	5.43794	1211.97	8472.57	blue	Flavonoids
negative	M447_R272_16945	4.539	447.085	594.158	[M-C6H10O4-H]-	Massbank:PR100665 Kaempferol-3-O-rutinoside|Kaem-3-Glc-6pp-Rha|Nicotiflorin|kaempferol-3-rhamnoglucoside	C27H30O15	c(c5)(O)cc(c(c51)C(C(OC(O3)C(C(C(C3COC(C4O)OC(C(C4O)O)C)O)O)O)=C(c(c2)ccc(O)c2)O1)=O)O	RTATXGUCZHCSNG-QHWHWDPRSA-N	0.0539116	9.12231	988.583	6247.94	common	Flavonoids
negative	M463_R250_17676	4.164	463.079	464.095	[M-H]-	Isoquercetrin	C21H20O12	O=C1C(OC2OC(CO)C(O)C(O)C2O)=C(OC=3C=C(O)C=C(O)C13)C=4C=CC(O)=C(O)C4	OVSQVDMCBVZWGM-QSOFNFLRSA-N	0.00036034	12.3471	5529	78391.1	blue	Flavonoids
negative	M463_R360_17680	5.997	463.096	610.153	[M-C6H10O4-H]-	3-[4,5-dihydroxy-6-(hydroxymethyl)-3-[3,4,5-trihydroxy-6-(hydroxymethyl)oxan-2-yl]oxyoxan-2-yl]oxy-5,7-dihydroxy-2-(4-hydroxyphenyl)chromen-4-one	C27H30O16	OCC1OC(OC2C(O)C(O)C(CO)OC2Oc3c(oc4cc(O)cc(O)c4c3=O)c5ccc(O)cc5)C(O)C(O)C1O	LKZDFKLGDGSGEO-UHFFFAOYSA-N	0.0139443	0.35583	1825	398.47	yellow	Flavonoids
negative	M463_R365_17681	6.085	463.096	418.09	[M+HCOOH-H]-	Kaempferol 3-alpha-L-arabinopyranoside	C20H18O10	C1[C@@H]([C@@H]([C@H]([C@@H](O1)OC2=C(OC3=CC(=CC(=C3C2=O)O)O)C4=CC=C(C=C4)O)O)O)O	RNVUDWOQYYWXBJ-IEGSVRCHSA-N	0.139099	0.70574	6489.27	5019.75	common	Flavonoids
negative	M501_R257_19343	4.291	501.194	502.199	[M-H]-	Cycloheterophyllin	C30H30O7	CC(C)=CCC1=C2OC(C)(C)C=CC2=C(O)C2=C1OC1=C(C(OC3=C1C=C(O)C(O)=C3)C=C(C)C)C2=O	ZZPIXEJZTXAVCX-UHFFFAOYSA-N	0.052192	0.143504	5396.05	1006.73	common	Flavonoids
negative	M593_R219_23253	3.648	593.149	594.158	[M-H]-	Vicenin 2	C27H30O15	OCC1OC(C(O)C(O)C1O)C1=C(O)C(C2OC(CO)C(O)C(O)C2O)=C2OC(=CC(=O)C2=C1O)C1=CC=C(O)C=C1	FIAAVMJLAGNUKW-UHFFFAOYSA-N	0.219525	0.518366	20967.9	2781.77	common	Flavonoids
negative	M595_R211_23345	3.509	595.157	596.174	[M-H]-	(2R)-Naringenin 6,8-di-C-glucoside	C27H32O15	OCC1OC(C(O)C(O)C1O)C1=C(O)C2=C(OC(CC2=O)C2=CC=C(O)C=C2)C(C2OC(CO)C(O)C(O)C2O)=C1O	KLDARLGFVGIIIL-UHFFFAOYSA-N	0.440499	0.689648	4177.27	2151.53	common	Flavonoids
negative	M601_R41_23602	0.69	601.126	602.127	[M-H]-	Eriodictyol 7-(6-galloylglucoside)	C28H26O15	OC1C(O)C(COC(=O)C2=CC(O)=C(O)C(O)=C2)OC(OC2=CC(O)=C3C(=O)CC(OC3=C2)C2=CC(O)=C(O)C=C2)C1O	SHPCBRSOJXQRDY-UHFFFAOYSA-N	0.444813	0.440213	11889.9	9603.2	common	Flavonoids
negative	M651_R246_26035	4.1	651.145	652.164	[M-H]-	2''-(6-Acetylglucosyl)astragalin	C29H32O17	CC(=O)OCC1OC(OC2C(O)C(O)C(CO)OC2OC2=C(OC3=CC(O)=CC(O)=C3C2=O)C2=CC=C(O)C=C2)C(O)C(O)C1O	CDTNLNYMZSMCGJ-UHFFFAOYSA-N	0.0891243	0.000356785	39118.1	15.6381	common	Flavonoids
negative	M771_R203_31639	3.377	771.185	772.206	[M-H]-	Quercetin 3-O-glucosyl-rhamnosyl-galactoside	C33H40O21	C[C@@H]1O[C@@H](OC[C@H]2O[C@@H](OC3=C(OC4=C(C(O)=CC(O)=C4)C3=O)C3=CC(O)=C(O)C=C3)[C@H](O)[C@@H](O)[C@H]2O)[C@H](O)[C@H](O[C@@H]2O[C@H](CO)[C@@H](O)[C@H](O)[C@H]2O)[C@H]1O	XEFNBVWDOQCMSG-GJHFDJSNSA-N	0.275159	2.47322	1041.19	2397.42	common	Flavonoids
negative	M787_R228_32231	3.792	787.176	788.201	[M-H]-	Patuletin 3-(2''-apiosylgentiobioside)	C33H40O22	COC1=C(O)C2=C(OC(=C(OC3OC(COC4OC(CO)C(O)C(O)C4O)C(O)C(O)C3OC3OCC(O)(CO)C3O)C2=O)C2=CC(O)=C(O)C=C2)C=C1O	IQBTXBIIGNASBG-UHFFFAOYSA-N	0.317742	2.03212	1658.87	3288.05	common	Flavonoids
positive	M287_R242_14671	4.025	287.052	286.048	[M+H]+	Kaempferol	C15H10O6	OC1=CC=C(C=C1)C1=C(O)C(=O)C2=C(O)C=C(O)C=C2O1	IYRMWMYZSQPJKC-UHFFFAOYSA-N	0.000125049	14.4947	824.164	15697.2	blue	Flavonoids
positive	M449_R203_32766	3.386	449.105	448.101	[M+H]+	Luteolin-7-O-glucoside	C21H20O11	C1=CC(=C(C=C1C2=CC(=O)C3=C(C=C(C=C3O2)O[C@H]4[C@@H]([C@H]([C@@H]([C@H](O4)CO)O)O)O)O)O)O	PEFNSGRTCBGNAN-QNDFHXLGSA-N	0.0297994	5.09214	389.478	4027.69	blue	Flavonoids
positive	M303_R232_16530	3.874	303.049	302.043	[M+H]+	Quercetin	C15H10O7	O=C1C(O)=C(OC=2C=C(O)C=C(O)C12)C=3C=CC(O)=C(O)C3	REFJWTPEDVJJIY-UHFFFAOYSA-N	0.00344753	1.85511	51421.4	95870.8	blue	Flavonoids
positive	M465_R254_34290	4.236	465.099	464.095	[M+H]+	6-Hydroxykaempferol 7-alloside	C21H20O12	OCC1OC(OC2=CC3=C(C(O)=C2O)C(=O)C(O)=C(O3)C2=CC=C(O)C=C2)C(O)C(O)C1O	IYEWEDZIDUAUTD-UHFFFAOYSA-N	0.149436	13.2854	74.2972	484.079	common	Flavonoids
positive	M627_R236_50906	3.934	627.152	626.148	[M+H]+	Quercetin 3-glucosyl-(1->2)-galactoside	C27H30O17	OCC1OC(OC2C(O)C(O)C(CO)OC2OC2=C(OC3=CC(O)=CC(O)=C3C2=O)C2=CC(O)=C(O)C=C2)C(O)C(O)C1O	RDUAJIJVNHKTQC-UHFFFAOYSA-N	0.0762723	23.7039	1126.83	17940.9	common	Flavonoids
positive	M435_R363_31537	6.058	435.107	434.085	[M+H]+	Quercetin 3-O-beta-D-xylopyranoside	C20H18O11	O=C1C(OC2OCC(O)C(O)C2O)=C(OC=3C=C(O)C=C(O)C13)C=4C=CC(O)=C(O)C4	PZZRDJXEMZMZFD-UHFFFAOYSA-N	0.00691872	0.277732	1937.52	549.547	yellow	Flavonoids
positive	M449_R253_32768	4.218	449.107	448.101	[M+H]+	Luteolin 7-galactoside	C21H20O11	OCC1OC(OC2=CC(O)=C3C(=O)C=C(OC3=C2)C2=CC(O)=C(O)C=C2)C(O)C(O)C1O	PEFNSGRTCBGNAN-UHFFFAOYSA-N	0.137868	2.75048	601.798	1551.74	common	Flavonoids
positive	M455_R35_33314	0.579	455.118	432.142	[M+Na]+	3,5,6,7,8,3',4'-Heptamethoxyflavone	C22H24O9	O=C1C(OC)=C(OC2=C(OC)C(OC)=C(OC)C(OC)=C12)C=3C=CC(OC)=C(OC)C3	SSXJHQZOHUYEGD-UHFFFAOYSA-N	0.0183028	0.276548	2709.77	815.957	yellow	Flavonoids
positive	M465_R197_34295	3.281	465.101	464.095	[M+H]+	Spiraeoside	C21H20O12	C1=CC(=C(C=C1C2=C(C(=O)C3=C(C=C(C=C3O2)O)O)O)O)O[C@H]4[C@@H]([C@H]([C@@H]([C@H](O4)CO)O)O)O	OIUBYZLTFSLSBY-HMGRVEAOSA-N	0.119766	2.06474	6057.77	13451.9	common	Flavonoids
positive	M345_R231_21203	3.857	345.057	344.053	[M+H]+	3,5,3'-trihydroxy-4'-methoxy-6,7-methylenedioxyflavone	C17H12O8	COc1ccc(cc1O)C2=C(O)C(=O)c3c(O)c4OCOc4cc3O2	PMVMMASHOBXCTO-UHFFFAOYSA-N	0.331269	1.59278	94.7684	112.278	common	Flavonoids
positive	M465_R366_34306	6.108	465.119	464.095	[M+H]+	quercetin-7-O-glucoside	C21H20O12	OC1OC(COc2cc(O)c3OC(=C(C(=O)c3c2)c4ccc(O)c(O)c4)O)C(O)C(O)C1O	VKPZUISEBPQDMQ-GUFUGUNKSA-N	0.0388898	0.496253	20377.6	11779	yellow	Flavonoids
positive	M479_R195_35519	3.242	479.075	640.128	[M-C6H10O5+H]+	Quercetin 3-[glucosyl-(1->?)-glucuronide]	C27H28O18	OC[C@H]1O[C@@H](O[C@H]2[C@H](O)[C@@H](O)[C@H](OC3=C(OC4=CC(O)=CC(O)=C4C3=O)C3=CC(O)=C(O)C=C3)O[C@@H]2C(O)=O)[C@H](O)[C@@H](O)[C@@H]1O	RFPZGZUMXXMVEL-UBSYNHCDSA-N	0.0121632	2184.99	0	5314.69	blue	Flavonoids
positive	M581_R203_45996	3.379	581.147	580.143	[M+H]+	Rustoside	C26H28O15	OCC1OC(OC2=C(OC3=CC(O)=CC(O)=C3C2=O)C2=CC=C(O)C=C2)C(OC2OCC(O)C(O)C2O)C(O)C1O	RXAXTTGJEMODPY-UHFFFAOYSA-N	0.0481407	538.549	5.17334	3731.33	blue	Flavonoids
positive	M301_R335_16262	5.588	301.066	300.063	[M+H]+	Massbank:BML01602 Chrysoeriol	C16H12O6	COC1=C(C=CC(=C1)C2=CC(=O)C3=C(C=C(C=C3O2)O)O)O	SCZVLDHREVKTSH-UHFFFAOYSA-N	0.0762755	0.375014	449.298	206.27	common	Flavonoids
positive	M789_R197_63555	3.284	789.205	788.201	[M+H]+	Quercetin 3-sophorotrioside	C33H40O22	OCC1OC(OC2C(O)C(O)C(CO)OC2OC2C(O)C(O)C(CO)OC2OC2=C(OC3=C(C(O)=CC(O)=C3)C2=O)C2=CC(O)=C(O)C=C2)C(O)C(O)C1O	IQBMWEYFKNVACH-UHFFFAOYSA-N	0.0914967	2.08268	1294.15	2909.99	common	Flavonoids
positive	M543_R47_42264	0.782	543.129	542.121	[M+H]+	Yuccaol C	C30H22O10	COC1=C(O)C=C(\C=C\C2=CC(O)=CC3=C2C2(C(OC4=C2C(O)=CC(O)=C4)C2=CC=C(O)C=C2)C(=O)O3)C=C1O	UMQRRGZFEXVPFD-NSCUHMNNSA-N	0.0956929	2.09828	4795.73	17136.3	common	Flavonoids
negative	M409_R527_15194	8.776	409.231	410.243	[M-H]-	LPA 16:0	C19H39O7P	CCCCCCCCCCCCCCCC(=O)OCC(O)COP(O)(O)=O	YNDYKPRNFWPPFU-UHFFFAOYSA-N	0.687679	0.687107	1213.13	88.8798	common	Glycerophospholipids
negative	M452_R454_17226	7.563	452.269	453.286	[M-H]-	Spectral Match to 1-Hexadecanoyl-sn-glycero-3-phosphoethanolamine from NIST14	C21H44NO7P	CCCCCCCCCCCCCCCC(=O)OC[C@H](COP(=O)(O)OCCN)O	YVYMBNSKXOXSKW-HXUWFJFHSA-N	0.0409857	3.21018	263.274	5923.62	blue	Glycerophospholipids
negative	M452_R462_17227	7.702	452.271	453.286	[M-H]-	LPE 16:0	C21H44NO7P	CCCCCCCCCCCCCCCC(=O)OCC(O)COP(O)(=O)OCCN	YVYMBNSKXOXSKW-UHFFFAOYSA-N	0.0313204	2.8405	1819.95	46630.4	blue	Glycerophospholipids
negative	M474_R424_18160	7.07	474.251	475.27	[M-H]-	1-Hydroxy-2-(9Z,12Z,15Z-octadecatrienoyl)-sn-glycero-3-phosphoethanolamine (NMR)	C23H42NO7P	CC/C=C\C/C=C\C/C=C\CCCCCCCC(=O)O[C@H](CO)COP(=O)(O)OCCN	JGWWMNVPHKMUCV-WOBXFXBNSA-N	0.676931	1.33692	1487.9	14345.7	common	Glycerophospholipids
negative	M476_R440_18258	7.326	476.266	477.286	[M-H]-	1-Hydroxy-2-(9Z,12Z-octadecadienoyl)-sn-glycero-3-phosphoethanolamine (NMR)	C23H44NO7P	CCCCC/C=C\C/C=C\CCCCCCCC(=O)O[C@H](CO)COP(=O)(O)OCCN	SVRBKLJIDJHADS-USWSLJGRSA-N	0.322713	1.92207	470.705	6119.72	common	Glycerophospholipids
negative	M476_R447_18259	7.443	476.267	477.286	[M-H]-	1-(9Z,12Z-Octadecadienoyl)-2-hydroxy-sn-glycero-3-phosphoethanolamine (NMR)	C23H44NO7P	CCCCC/C=C\C/C=C\CCCCCCCC(=O)OC[C@H](COP(=O)(O)OCCN)O	DBHKHNGBVGWQJE-USWSLJGRSA-N	0.0434282	3.02863	1200.18	39662.5	blue	Glycerophospholipids
negative	M483_R506_18617	8.429	483.258	484.28	[M-H]-	LPG 16:0	C22H45O9P	CCCCCCCCCCCCCCCC(=O)OCC(O)COP(O)(=O)OCC(O)CO	BVJSKAUUFXBDOB-UHFFFAOYSA-N	0.916919	0.93887	917.298	1658.3	common	Glycerophospholipids
negative	M559_R456_21884	7.604	559.302	514.314	[M+HCOOH-H]-	NCGC00380867-01_C27H46O9_9,12,15-Octadecatrienoic acid, 3-(hexopyranosyloxy)-2-hydroxypropyl ester, (9Z,12Z,15Z)-	C27H46O9	CC\C=C/C/C=C\C\C=C/CCCCCCCC(=O)OCC(O)COC1OC(CO)C(O)C(O)C1O	HUSISCNTLUEZCN-PDBXOOCHSA-N	0.337915	2.35028	8399.75	12934	common	Glycerophospholipids
negative	M561_R482_21962	8.031	561.316	516.33	[M+HCOOH-H]-	Massbank:PR309166 MGMG 18:2	C27H48O9	O=C(OCC(O)COC1OC(CO)C(O)C(O)C1(O))CCCCCCCC=CCC=CCCCCC	LBHUIJRTHBBWHP-UHFFFAOYSA-N	0.3763	2.14875	784.168	926.471	common	Glycerophospholipids
negative	M433_R510_16283	8.497	433.245	434.243	[M-H]-	LPA 18:2	C21H39O7P	CCCCC\C=C/C\C=C/CCCCCCCC(=O)OCC(O)COP(O)(O)=O	ZQTAMPRZFOOEEP-HZJYTTRNNA-N	0.0766228	9.68384	0.551422	30019.7	common	Glycerophospholipids
negative	M671_R852_26939	14.193	671.451	672.473	[M-H]-	PA 34:2	C37H69O8P	CCCCCCCCCCCCCCCC(=O)OCC(COP(O)(O)=O)OC(=O)CCCCCCC\C=C/C\C=C/CCCCC	YQMUIZXKIKXZHD-BCTRXSSUSA-N	0.0808803	0.417286	3620.1	1085.89	common	Glycerophospholipids
negative	M695_R852_28222	14.195	695.446	696.473	[M-H]-	1,2-Di-(9Z,12Z-octadecadienoyl)-sn-glycero-3-phosphate	C39H69O8P	CCCCC\C=C\C\C=C\CCCCCCCC(=O)OCC(COP(O)(O)=O)OC(=O)CCCCCCC\C=C\C\C=C\CCCCC	OBXRDFNCKFWKNY-WVZYQCMWSA-N	0.30961	0.59851	2072.91	666.09	common	Glycerophospholipids
negative	M745_R852_30597	14.202	745.486	746.51	[M-H]-	PG(16:1(9Z)/18:1(9Z))	C40H75O10P	[H][C@](O)(CO)COP(O)(=O)OC[C@@]([H])(COC(=O)CCCCCCC\C=C/CCCCCC)OC(=O)CCCCCCC\C=C/CCCCCCCC	VCYYBLIRAQBPTM-GDNUZSQHSA-N	0.959343	1.02873	2085.31	1369.61	common	Glycerophospholipids
negative	M834_R851_33886	14.19	833.505	834.526	[M-H]-	PI(16:1(9Z)/18:1(9Z))	C43H79O13P	[H][C@@](COC(=O)CCCCCCC\C=C/CCCCCC)(COP(O)(=O)O[C@H]1C(O)C(O)C(O)[C@@H](O)C1O)OC(=O)CCCCCCC\C=C/CCCCCCCC	GXAHXPDRXNWFIX-UZBWDOCNSA-N	0.244565	0.526044	12326	1578.53	common	Glycerophospholipids
positive	M313_R464_17863	7.731	313.273	330.277	[M+H-H2O]+	MG(0:0/16:0/0:0)	C19H38O4	[H]C(CO)(CO)OC(=O)CCCCCCCCCCCCCCC	BBNYCLAREVXOSG-UHFFFAOYSA-N	0.0213897	2.69578	233.521	1266.64	blue	Glycerophospholipids
positive	M476_R426_35283	7.102	476.28	475.27	[M+H]+	LPE 18:3	C23H42NO7P	CC\C=C/C\C=C/C\C=C/CCCCCCCC(=O)OCC(O)COP(O)(=O)OCCN	NTBBASCGALPTDC-PDBXOOCHSA-N	0.42584	1.7494	242.882	6767.69	common	Glycerophospholipids
positive	M478_R448_35459	7.473	478.295	477.286	[M+H]+	LPE 18:2	C23H44NO7P	CCCCC\C=C/C\C=C/CCCCCCCC(=O)OCC(O)COP(O)(=O)OCCN	DBHKHNGBVGWQJE-HZJYTTRNSA-N	0.0799034	2.50125	588.1	23182.7	common	Glycerophospholipids
positive	M700_R508_57055	8.467	700.415	677.427	[M+Na]+	PS(14:0/14:1(9Z))	C34H64NO10P	[H][C@](N)(COP(O)(=O)OC[C@@]([H])(COC(=O)CCCCCCCCCCCCC)OC(=O)CCCCCCC\C=C/CCCC)C(O)=O	UJDLXQDMWGXLFK-XJFGLLPISA-N	0.186584	4.18966	893.262	1797.53	common	Glycerophospholipids
negative	M133_R38_3659	0.637	133.013	134.022	[M-H]-	L-Malic acid	C4H6O5	O[C@@H](CC(O)=O)C(O)=O	BJEPYKJPYRNKOW-REOHCLBHSA-N	0.660684	0.834256	4597.53	4310.03	common	Organic acids and derivatives
negative	M149_R37_4229	0.619	149.046	114.079	[M+Cl]-	Massbank:EQ314754 Prolinamide|2-pyrrolidinecarboxamide|2-Pyrrolidinecarboxamide, (S)-	C5H10N2O	O=C(N)C1NCCC1	VLJNHYLEOZPXFW-UHFFFAOYSA-N	0.0881728	0.234157	2376.97	669.006	common	Organic acids and derivatives
negative	M191_R63_5822	1.056	191.015	192.027	[M-H]-	Citric acid	C6H8O7	OC(CC(O)(C(O)=O)CC(O)=O)=O	KRKNYBCHXYNGOX-UHFFFAOYSA-N	0.471854	0.717369	4204.19	2161.03	common	Organic acids and derivatives
negative	M191_R41_5827	0.676	191.017	192.027	[M-H]-	Isocitric acid	C6H8O7	OC(C(CC(O)=O)C(O)=O)C(O)=O	ODBLHEXUDAPZAU-UHFFFAOYSA-N	0.0781932	0.487098	15068	8015.44	common	Organic acids and derivatives
negative	M195_R178_6003	2.971	195.047	196.058	[M-H]-	GLUCONATE	C6H12O7	O=C(O)C(O)C(O)C(O)C(O)CO	RGHNJXZEOKUKBD-SQOUGZDYSA-N	0.00392832	0.0152462	9568.09	123.489	yellow	Organic acids and derivatives
negative	M195_R34_6008	0.569	195.05	196.058	[M-H]-	1726059 - 30.0 eV	C6H12O7	C([C@H]([C@@H]([C@@H]([C@H](C(=O)O)O)O)O)O)O	RGHNJXZEOKUKBD-MGCNEYSASA-N	0.0517685	0.411442	7134.36	2580.79	common	Organic acids and derivatives
negative	M738_R413_30242	6.88	738.342	739.354	[M-H]-	Glabrin D	C36H49N7O10	CC(C)C1NC(=O)C2CCCN2C(=O)C2CCCN2C(=O)C(CCC(O)=O)NC(=O)C2CCCN2C(=O)CNC(=O)C(CC2=CC=C(O)C=C2)NC1=O	HUBKEBDFQLHLMX-UHFFFAOYSA-N	0.797756	0.866213	6016.53	4042.92	common	Organic acids and derivatives
positive	M166_R53_6003	0.889	166.086	165.079	[M+H]+	L-Phenylalanine	C9H11NO2	c1ccc(cc1)C[C@@H](C(=O)O)N	COLNVLDHVKWLRT-QMMMGPOBSA-N	0.597211	1.20837	725.163	1113.38	common	Organic acids and derivatives
positive	M324_R525_19051	8.75	324.284	323.282	[M+H]+	Spectral Match to Linoleoyl ethanolamide from NIST14	C20H37NO2	CCCCC/C=C\C/C=C\CCCCCCCC(=O)NCCO	KQXDGUVSAAQARU-HZJYTTRNSA-N	0.0674308	0.349259	5261.79	1546.76	common	Organic acids and derivatives
positive	M496_R362_36973	6.032	496.13	473.152	[M+Na]+	N-(3-chloro-4-fluorophenyl)-2-{4-[(6-ethoxy-2-oxochromen-4-yl)methyl]piperazin yl}acetamide CollisionEnergy:102040	C24H25ClFN3O4	CCOc1ccc2oc(=O)cc(CN3CCN(CC(O)=Nc4ccc(F)c(Cl)c4)CC3)c2c1	BBDAHOANYVIPKL-UHFFFAOYSA-N	0.0187807	2.51334	716.618	2323.39	blue	Organic acids and derivatives
positive	M595_R551_47306	9.177	595.253	594.249	[M+H]+	(R)-N-((R)-1-(2-aminoacetamido)-4-methyl-1-oxopentan-2-yl)-1-(2-((3-(4-fluorophenyl)-2-methyl-4-oxo-4H-chromen-7-yl)oxy)acetyl)pyrrolidine-2-carboxamide	C31H35FN4O7	O=C1C2=CC=C(OCC(=O)N3CCCC3C(=O)NC(C(=O)NC(=O)CN)CC(C)C)C=C2OC(=C1C=4C=CC(F)=CC4)C	YYDNTRUSBQCYPN-UHFFFAOYSA-N	0.0133044	0.0977617	3220.28	271.896	yellow	Organic acids and derivatives
positive	M688_R258_56108	4.293	688.394	705.394	[M+H-H2O]+	Fumonisin B2	C34H59NO14	CCCCC(C)C(OC(=O)CC(CC(O)=O)C(O)=O)C(CC(C)CCCCCCC(O)CC(O)C(C)N)OC(=O)CC(CC(O)=O)C(O)=O	UXDPXZQHTDAXOZ-UHFFFAOYSA-N	0.140034	0.215337	5884.32	2815.98	common	Organic acids and derivatives
positive	M154_R51_5417	0.857	154.104	329.126	[M-C6H8O6+H]+	phenylmethyl (2S)-3-hydroxy-2-[(phenylmethoxy)carbonylamino]propanoate CollisionEnergy:205060	C18H19NO5	O=C(OCc1ccccc1)C(CO)N=C(O)OCc1ccccc1	MHHDPGHZHFJLBZ-UHFFFAOYSA-N	0.4703	1.33205	4.38528	5.2676	common	Organic acids and derivatives
negative	M564_R450_22073	7.501	564.322	519.332	[M+HCOOH-H]-	2-18:2(9Z,12Z)-lysophosphatidylcholine	C26H51NO7P	CCCCC\C=C/C\C=C/CCCCCCCC(=O)OC[C@@]([H])(O)COP([O-])(=O)OCC[N+](C)(C)C	SPJFYYJXNPEZDW-FTJOPAKQSA-N	0.755164	1.37889	182.18	4450.96	common	Organoheterocyclic compounds
negative	M564_R443_22074	7.38	564.323	519.332	[M+HCOOH-H]-	Massbank:PR309159 LPC 18:2	C26H50NO7P	O=C(OCC(O)COP(=O)([O-])OCC[N+](C)(C)C)CCCCCCCC=CCC=CCCCCC	SPJFYYJXNPEZDW-UHFFFAOYSA-N	0.7484	1.4004	125.34	902.755	common	Organoheterocyclic compounds
positive	M301_R292_16273	4.87	301.116	318.11	[M+H-H2O]+	Agarotetrol	C17H18O6	O=C1C=C(OC2=C1C(O)C(O)C(O)C2O)CCC=3C=CC=CC3	CWMIROLCTHMEEO-UHFFFAOYSA-N	0.574897	0.801918	3757.45	2406.97	common	Organoheterocyclic compounds
positive	M348_R410_21541	6.836	348.087	347.079	[M+H]+	5-amino-2-(6-hydroxy-3-oxoxanthen-9-yl)benzoic acid CollisionEnergy:102040	C20H13NO5	Nc1ccc(-c2c3ccc(=O)cc-3oc3cc(O)ccc23)c(C(=O)O)c1	UTUYQGGHTUQHQQ-UHFFFAOYSA-N	0.985578	0.982698	3531.18	555.02	common	Organoheterocyclic compounds
positive	M355_R261_22398	4.344	355.136	354.134	[M+H]+	Hydroprotopine	C20H20NO5+	OC12C3=CC=4OCOC4C=C3CC[N+]2(C)CC5=C6OCOC6=CC=C5C1	SZMZXQWCICMUFH-UHFFFAOYSA-N	0.204991	2.18127	3174.02	5537.7	common	Organoheterocyclic compounds
positive	M151_R202_5244	3.373	151.075	118.042	[M+CH3OH+H]+	Benzofuran	C8H6O	O1C=CC2=C1C=CC=C2	IANQTJSKSUMEQM-UHFFFAOYSA-N	0.108622	0.0852351	62.1858	7.01202	common	Organoheterocyclic compounds
positive	M520_R445_39381	7.409	520.337	519.332	[M+H]+	LPC 18:2-SN2	C26H50NO7P	CCCCC\C=C/C\C=C/CCCCCCCC(=O)OCC(O)COP([O-])(=O)OCC[N+](C)(C)C	SPJFYYJXNPEZDW-UTJQPWESNA-N	0.392987	1.89417	573.86	21881.1	common	Organoheterocyclic compounds
negative	M283_R365_9169	6.082	283.022	284.032	[M-H]-	rhein	C15H8O6	OC(=O)C1=CC(O)=C2C(=O)C3=C(O)C=CC=C3C(=O)C2=C1	FCDLCPWAQCPTKC-UHFFFAOYSA-N	0.156995	0.742386	3611.47	2809.58	common	Others
negative	M299_R335_10041	5.576	299.019	300.027	[M-H]-	Emodic acid	C15H8O7	O=C1c2cc(O)cc(O)c2C(=O)c2c1cc(C(=O)O)cc2O	ZJXVNNSMRGTDBI-UHFFFAOYSA-N	0.000324606	0.0046832	29265.4	166.962	yellow	Others
positive	M247_R852_10724	14.196	247.161	264.173	[M+H-H2O]+	NCGC00385962-01_C16H24O3_	C16H24O3	CC1C\C=C\C=C/CCCCC(O)C\C=C\C(=O)O1	IKJZVOVTPXBUBG-QVWJMUBJSA-N	0.65395	1.10081	1491.25	1770.19	common	Others
positive	M271_R329_12478	5.489	271.057	270.053	[M+H]+	Aloeemodin	C15H10O5	OCC1=CC2=C(C(O)=C1)C(=O)C1=C(C=CC=C1O)C2=O	YDQWDHRMZQUTBA-UHFFFAOYSA-N	0.861322	0.938127	1172.17	822.807	common	Others
positive	M277_R385_13216	6.411	277.175	294.183	[M+H-H2O]+	Nordihydrocapsiate	C17H26O4	COC1=C(O)C=CC(COC(=O)CCCCCC(C)C)=C1	BXBVPYSHEOQGHP-UHFFFAOYSA-N	0.202619	0.564442	3092.68	1414.55	common	Others
negative	M177_R269_5299	4.485	177.015	178.027	[M-H]-	esculetin	C9H6O4	O=c1ccc2cc(O)c(O)cc2o1	ILEDWLMCKZNDJK-UHFFFAOYSA-N	0.00086585	36.8215	237.248	10863.8	blue	Phenylpropanoids
negative	M179_R220_5371	3.662	179.035	180.042	[M-H]-	cis-Caffeic acid	C9H8O4	OC(=O)\C=C\C1=CC(O)=C(O)C=C1	QAIPRVGONGVQAS-DUXPYHPUSA-N	0.265611	0.463907	2185.39	1810.54	common	Phenylpropanoids
negative	M193_R283_5917	4.711	193.049	194.058	[M-H]-	Metameconine	C10H10O4	O=C1OCC2=CC(OC)=C(OC)C=C12	UKFAWRZYFYOXEG-UHFFFAOYSA-N	0.000638159	12.5605	1350.17	18274.8	blue	Phenylpropanoids
negative	M339_R195_12010	3.256	339.068	340.079	[M-H]-	ESCULIN	C15H16O9	C1=CC(=O)OC2=C1C=C(C(=C2)O)O[C@H]3[C@@H]([C@H]([C@@H]([C@@H](CO)O3)O)O)O	XHCADAYNFIFUHF-TVKJYDDYSA-N	0.0160042	2.19891	676.717	1528.03	blue	Phenylpropanoids
negative	M341_R193_12122	3.215	341.081	342.095	[M-H]-	1-O-Caffeoylglucose	C15H18O9	OCC1OC(OC(=O)\C=C\C2=CC(O)=C(O)C=C2)C(O)C(O)C1O	WQSDYZZEIBAPIN-DUXPYHPUSA-N	4.22979e-05	4.25517	35791.3	180499	blue	Phenylpropanoids
negative	M341_R87_12126	1.457	341.085	342.095	[M-H]-	1-O-Caffeoyl-beta-D-glucose	C15H18O9	OC[C@H]1O[C@@H](OC(=O)\C=C\C2=CC(O)=C(O)C=C2)[C@H](O)[C@@H](O)[C@@H]1O	WQSDYZZEIBAPIN-VBQORRLJSA-N	0.000301575	8.72192	230.464	4742.25	blue	Phenylpropanoids
negative	M355_R219_12820	3.646	355.096	518.164	[M-C6H10O5-H]-	[6-[3,4-dihydroxy-2,5-bis(hydroxymethyl)oxolan-2-yl]oxy-3,4,5-trihydroxyoxan-2-yl]methyl (E)-3-(4-hydroxy-3-methoxyphenyl)prop-2-enoate	C22H30O14	COC1=C(C=CC(=C1)C=CC(=O)OCC2C(C(C(C(O2)OC3(C(C(C(O3)CO)O)O)CO)O)O)O)O	XMBZZLUIFFOAHR-HWKANZROSA-N	0.521953	1.35672	1397.04	2508.07	common	Phenylpropanoids
negative	M519_R179_20202	2.985	519.126	484.158	[M+Cl]-	[(2R,3S,4S,5R,6R)-3,4,5-trihydroxy-6-[2-(3-hydroxy-5-oxooxolan-3-yl)propoxy]oxan-2-yl]methyl (E)-3-(3,4-dihydroxyphenyl)prop-2-enoate	C22H28O12	CC(CO[C@@H]1O[C@H](COC(=O)\C=C\C2=CC(=C(O)C=C2)O)[C@@H](O)[C@H](O)[C@H]1O)C3(O)COC(=O)C3	YNPOIPFNQJKGQJ-SALKWGHLSA-N	0.0371769	0.0531125	9403.29	355.71	yellow	Phenylpropanoids
negative	M525_R332_20467	5.53	525.153	688.2	[M-C6H10O5-H]-	Massbank:PR309178 Flavone base + 3O, 2MeO, O-guaiacylglycerol-Hex	C33H36O16	O=C1C=C(OC2=CC(O)=CC(O)=C12)C=5C=C(OC)C(OC(COC3OC(CO)C(O)C(O)C3(O))C(O)C=4C=CC(O)=C(OC)C=4)=C(OC)C=5	WTKUHKWWAMSHEE-UHFFFAOYSA-N	0.260373	3.02114	21.6531	694.875	common	Phenylpropanoids
negative	M503_R35_19442	0.584	503.138	504.148	[M-H]-	6-Caffeoylsucrose	C21H28O14	OCC1OC(CO)(OC2OC(COC(=O)\C=C\C3=CC(O)=C(O)C=C3)C(O)C(O)C2O)C(O)C1O	UZUDNVXQOKQTDO-DUXPYHPUSA-N	0.0315939	2.24816	6256.58	23336	blue	Phenylpropanoids
positive	M181_R193_6743	3.209	181.047	180.042	[M+H]+	caffeic acid CollisionEnergy:205060	C9H8O4	O=C(O)C=Cc1ccc(O)c(O)c1	QAIPRVGONGVQAS-UHFFFAOYSA-N	0.00572677	18.0377	39.2577	1685.06	blue	Phenylpropanoids
positive	M251_R177_10966	2.958	251.138	250.132	[M+H]+	N-Caffeoylputrescine, (E)-	C13H18N2O3	O=C(C=CC1=CC=C(O)C(O)=C1)NCCCCN	KTZNZCYTXQYEHT-UHFFFAOYSA-N	0.0112512	452.381	20.2122	11126.7	blue	Phenylpropanoids
positive	M284_R291_14263	4.844	284.127	283.121	[M+H]+	Massbank:PR311081 Coumaroyl tyramine	C17H17NO3	O=C(C=CC1=CC=C(O)C=C1)NCCC2=CC=C(O)C=C2	RXGUTQNKCXHALN-UHFFFAOYSA-N	0.0458055	3.5749	688.501	2473.78	blue	Phenylpropanoids
positive	M314_R296_17982	4.935	314.138	313.131	[M+H]+	NCGC00169550-02!(E)-3-(4-hydroxy-3-methoxyphenyl)-N-[2-(4-hydroxyphenyl)ethyl]prop-2-enamide [IIN-based: Match]	C18H19NO4	COC1=C(O)C=CC(\\C=C\\C(=O)NCCC2=CC=C(O)C=C2)=C1	NPNNKDMSXVRADT-WEVVVXLNSA-N	0.629764	0.792952	2485.97	2005.53	common	Phenylpropanoids
positive	M325_R225_19116	3.756	325.087	324.085	[M+H]+	Skimmin	C15H16O8	OCC1OC(OC2=CC3=C(C=CC(=O)O3)C=C2)C(O)C(O)C1O	VPAOSFFTKWUGAD-UHFFFAOYSA-N	0.091301	179.898	29.4295	4998.18	common	Phenylpropanoids
positive	M334_R392_19929	6.534	334.07	311.083	[M+Na]+	methyl (2E)-3-{5-[(cyclopropylamino)sulfonyl]-2-methoxyphenyl}prop-2-enoate CollisionEnergy:102040	C14H17NO5S	COC(=O)C=Cc1cc(S(=O)(=O)NC2CC2)ccc1OC	GNJJGWWCQOQWCZ-UHFFFAOYSA-N	0.952238	1.02932	3389.28	2942.19	common	Phenylpropanoids
positive	M355_R36_22380	0.603	355.08	332.082	[M+Na]+	"(2E)-3-(2-chlorophenyl)-1-(2,4,6-trimethoxyphenyl)prop-2-en-1-one CollisionEnergy:102040"	C18H17ClO4	COc1cc(OC)c(C(=O)C=Cc2ccccc2Cl)c(OC)c1	VALXXUGYOUKCIH-UHFFFAOYSA-N	0.234972	0.426652	1274.29	932.799	common	Phenylpropanoids
positive	M419_R186_29809	3.105	419.189	396.194	[M+Na]+	NCGC00179905-02!(E)-3-(4-methoxyphenyl)-1-[2,4,6-trimethoxy-3-(3-methylbut-2-enyl)phenyl]prop-2-en-1-one [IIN-based on: CCMSLIB00000846372]	C24H28O5	COC1=CC=C(\\C=C\\C(=O)C2=C(OC)C(CC=C(C)C)=C(OC)C=C2OC)C=C1	GGNVSANPVOEGII-GXDHUFHOSA-N	0.0521433	598.473	12.4623	6093.05	common	Phenylpropanoids
positive	M522_R185_39584	3.085	522.18	504.148	[M+NH4]+	1-O-Caffeoylaminaribiose	C21H28O14	OCC1OC(OC2C(O)C(O)C(CO)OC2OC(=O)C=Cc3ccc(O)c(O)c3)C(O)C(O)C1O	YYQLEEZKBXBSIH-OZARWLPESA-N	0.0686667	36.6132	45.4362	1982.4	common	Phenylpropanoids
positive	M689_R71_56184	1.184	689.202	666.216	[M+Na]+	2-Acetylacteoside	C31H38O16	O=C(OC1C(OC(OCCC2=CC=C(O)C(O)=C2)C(OC(=O)C)C1OC3OC(C)C(O)C(O)C3O)CO)C=CC4=CC=C(O)C(O)=C4	ALERZNQPBWWLMW-UHFFFAOYSA-N	0.00818803	14.929	23.0685	2661.58	blue	Phenylpropanoids
positive	M705_R35_57470	0.583	705.181	682.211	[M+Na]+	Tenuifoliside A	C31H38O17	O=C(OCC1OC(OC2(OC(CO)C(O)C2OC(=O)C3=CC=C(O)C=C3)CO)C(O)C(O)C1O)C=CC4=CC(OC)=C(OC)C(OC)=C4	VOZDDCMEFRAJHD-UHFFFAOYSA-N	0.00230384	101.39	1690.38	320673	blue	Phenylpropanoids
positive	M222_R203_9190	3.383	222.145	204.115	[M+NH4]+	Isobutyl cinnamate	C13H16O2	CC(C)COC(=O)\C=C/C1=CC=CC=C1	IQZUZPKOFSOVET-HJWRWDBZSA-N	0.019663	0.127572	8121.19	854.979	yellow	Phenylpropanoids
negative	M541_R338_21129	5.636	541.149	542.152	[M-H]-	3,3'-Bisanigorufone	C38H22O4	OC1=C(C2=CC=CC3=C2C(C1=O)=C(C=C3)C1=CC=CC=C1)C1=C(O)C(=O)C2=C(C=CC3=C2C1=CC=C3)C1=CC=CC=C1	OSRDPAQFDDSKQU-UHFFFAOYSA-N	0.00152142	4.5999	26.9208	236.625	blue	Prenol lipids
negative	M529_R484_20642	8.064	529.296	530.288	[M-H]-	Ganoderic acid N	C30H42O8	CC(CC(=O)CC(C)(O)C1CC(=O)C2(C)C3=C(C(=O)CC12C)C1(C)CCC(=O)C(C)(C)C1CC3O)C(O)=O	XXHBQOHASACCAP-UHFFFAOYSA-N	0.143681	0.29657	1730.17	232.893	common	Prenol lipids
negative	M837_R402_34051	6.707	837.397	838.399	[M-H]-	Massbank:PR308376 Licoricesaponin G2	C42H62O17	CC12CCC(C)(CC1C1=CC(=O)C3C4(C)CCC(OC5OC(C(O)C(O)C5OC5OC(C(O)C(O)C5O)C(O)=O)C(O)=O)C(C)(CO)C4CCC3(C)C1(C)CC2)C(O)=O	WBQVRPYEEYUEBQ-UHFFFAOYSA-N	0.689133	1.34349	6537.12	6655.54	common	Prenol lipids
negative	M579_R222_22681	3.698	579.256	534.268	[M+HCOOH-H]-	3-Hydroxy-beta-ionol 3-[glucosyl-(1->6)-glucoside]	C25H42O12	CC(O)\C=C\C1=C(C)CC(CC1(C)C)OC1OC(COC2OC(CO)C(O)C(O)C2O)C(O)C(O)C1O	JZJSTNWTRLNQSL-AATRIKPKSA-N	0.949328	0.974175	1109.83	1333.34	common	Prenol lipids
positive	M181_R360_6762	6.006	181.122	180.115	[M+H]+	Limonencarbonsaeure|Limonenecarboxylic acid	C11H16O2	CC(=C/C(=O)O)C1CCC(=CC1)C	KENWRRUSJKMXOL-PCYYEKQGSA-N	0.341327	0.800568	3506.33	2831.23	common	Prenol lipids
positive	M335_R415_20066	6.916	335.254	302.225	[M+CH3OH+H]+	Abietic Acid	C20H30O2	CC(C)C(C3)=CC(=C2)C([H])(C3)C(C)(C1)C([H])(C2)C(C)(C(O)=O)CC1	RSWGJHLUYNHPMX-ONCXSQPRSA-N	0.0149073	2.47948	192.762	513.266	blue	Prenol lipids
positive	M423_R506_30268	8.432	423.36	422.355	[M+H]+	Glochidone putative	C30H46O	CC(=C)C1CCC2(C1C3CCC4C(C3(CC2)C)(CCC5C4(C=CC(=O)C5(C)C)C)C)C	FWBYBHVDDGVPDF-UHFFFAOYSA-N	9.65002e-05	11.1623	711.864	8104.98	blue	Prenol lipids
positive	M457_R528_33539	8.797	457.366	456.36	[M+H]+	ursolic acid	C30H48O3	O=C(O)C12CCC(C)C(C)C2C3=CCC4C5(C)CCC(O)C(C)(C)C5CCC4(C)C3(C)CC1	WCGUUGGRBIKTOS-UHFFFAOYSA-N	0.0576286	11.0583	1019.86	7353.69	common	Prenol lipids
positive	M527_R262_40296	4.365	527.335	504.345	[M+Na]+	Madecassic acid CollisionEnergy:102040	C30H48O6	CC1CCC2(C(=O)O)CCC3(C)C(=CCC4C5(C)CC(O)C(O)C(C)(CO)C5C(O)CC43C)C2C1C	PRAUVHZJPXOEIF-UHFFFAOYSA-N	0.00559013	2.6482	9830.39	24141.5	blue	Prenol lipids
positive	M537_R458_41593	7.63	537.302	514.293	[M+Na]+	Ganoderic acid D	C30H42O7	O=C1C2=C(C(O)CC3C(C(=O)CCC23C)(C)C)C4(C(=O)CC(C(C)CC(=O)CC(C(=O)O)C)C4(C)C1)C	YTVGSCZIHGRVAV-UHFFFAOYSA-N	0.00251297	4.09254	410.256	2740.35	blue	Prenol lipids
positive	M593_R597_47083	9.946	593.275	570.283	[M+Na]+	Ganoderic Acid F	C32H42O9	O=C(OC1C(=O)C2=C(C(=O)CC3C(C(=O)CCC23C)(C)C)C4(C(=O)CC(C(C)CC(=O)CC(C(=O)O)C)C14C)C)C	BWCNWXLKMWWVBT-UHFFFAOYSA-N	0.0541869	0.552396	67449.9	40239	common	Prenol lipids
positive	M625_R583_50689	9.717	625.296	602.288	[M+Na]+	5-{[(1R,3S,4aS,8aS)-3-hydroxy-5,5,8a-trimethyl-2-methylidene-decahydronaphthalen-1-yl]methyl}-4a-(5,7-dihydroxy-4-oxo-4H-chromen-2-yl)-2-methoxy-6-methyl-1,4,4a,5,8,8a-hexahydronaphthalene-1,4-dione	C36H42O8	CC(C)(CCC1)[C@@H](C[C@H]2O)[C@]1(C)[C@H](CC(C1(C(C=C3OC)=O)C(Oc4c5c(O)cc(O)c4)=CC5=O)C(C)=CCC1C3=O)C2=C	XRTOJGYRPZUDFW-UQNDMCLOSA-N	0.0629333	0.094002	14199.8	1351.25	common	Prenol lipids
positive	M653_R559_53356	9.309	653.259	630.268	[M+Na]+	13-Acetyl-9-dihydrobaccatin III	C33H42O12	O=C(OC1C2C3(OC(=O)C)COC3CC(O)C2(C)C(O)C(OC(=O)C)C4=C(C)C(OC(=O)C)CC1(O)C4(C)C)C=5C=CC=CC5	WPPPFZJNKLMYBW-UHFFFAOYSA-N	0.0172469	0.0439172	3114.78	152.882	yellow	Prenol lipids
positive	M689_R238_56207	3.963	689.385	666.398	[M+Na]+	[(2S,3R,4S,5S,6R)-3,4,5-trihydroxy-6-(hydroxymethyl)oxan-2-yl] (4aS,6aS,6bR,8R,9R,10R,11R,12aR)-8,10,11-trihydroxy-9-(hydroxymethyl)-2,2,6a,6b,9,12a-hexamethyl-1,3,4,5,6,6a,7,8,8a,10,11,12,13,14b-tetradecahydropicene-4a-carboxylate	C36H58O11	O=C(OC1OC(CO)C(O)C(O)C1O)C23CCC(C)(C)CC3C4=CCC5C6(C)CC(O)C(O)C(C)(CO)C6C(O)CC5(C)C4(C)CC2	DZVIFFMYEULLBY-NSOPSRGASA-N	2.38557e-05	3.5857	395.642	1823.17	blue	Prenol lipids
negative	M577_R449_22593	7.484	577.258	578.255	[M-H]-	Withaperuvin H	C30H42O9S	CC1=C(C)C(=O)OC(C1)C(C)(O)C1(O)CCC2(O)C3CC4SCC(O)OC5C=CC(=O)C(C)(C3CCC12C)C45O	RALUHIBMVXYCHB-UHFFFAOYSA-N	0.10964	0.138371	15193.8	648.849	common	Steroids and steroid derivatives
negative	M578_R451_22632	7.523	578.26	579.254	[M-H]-	Taurochenodeoxycholate-3-sulfate	C26H45NO9S2	[H][C@@]1(CC[C@@]2([H])[C@]3([H])[C@H](O)C[C@]4([H])C[C@@H](CC[C@]4(C)[C@@]3([H])C[C@@H](O)[C@]12C)S(O)(=O)=O)[C@H](C)CCC(=O)NCCS(O)(=O)=O	IJHJZQKOSUFQCX-WZJRQFJBSA-N	0.168228	0.236071	2436.22	244.65	common	Steroids and steroid derivatives
positive	M478_R468_35467	7.808	478.334	455.34	[M+Na]+	N-(4-((6aR,8aS)-4-hydroxy-6a,8a,9-trimethyl-3,4,5,6,6a,6b,7,8,8a,8b,11a,12,12a,12b-tetradecahydro-1H-naphtho[2',1':4,5]indeno[2,1-b]furan-10-yl)-2-methylbutyl)acetamide	C29H45NO3	O=C(NCC(C)CCC=1OC2CC3C4CC=C5CC(O)CCC5(C)C4CCC3(C)C2C1C)C	CNHACNVJEKRLHF-UHFFFAOYSA-N	0.518176	1.51544	72.6322	429.055	common	Steroids and steroid derivatives
positive	M500_R430_37370	7.16	500.307	499.297	[M+H]+	Taurochenodesoxycholic acid	C26H45NO6S	[H][C@@]1(CC[C@@]2([H])[C@]3([H])[C@H](O)C[C@]4([H])C[C@H](O)CC[C@]4(C)[C@@]3([H])CC[C@]12C)[C@H](C)CCC(=O)NCCS(O)(=O)=O	BHTRKEVKTKCXOH-BJLOMENOSA-N	0.194665	2.39585	16.9928	184.484	common	Steroids and steroid derivatives
positive	M607_R563_48669	9.387	607.256	584.283	[M+Na]+	ouabain CollisionEnergy:102040	C29H44O12	CC1OC(OC2CC(O)C3(CO)C4C(O)CC5(C)C(C6=CC(=O)OC6)CCC5(O)C4CCC3(O)C2)C(O)C(O)C1O	LPMXVESGRSUGHW-UHFFFAOYSA-N	0.0282145	0.0259097	11449.7	348.777	yellow	Steroids and steroid derivatives
positive	M752_R501_60660	8.344	752.445	751.414	[M+H]+	Massbank:PR301318 Germinaline	C39H61NO13	CCC(C)C(=O)OC1C(O)C2C(CN3CC(C)CCC3C2(C)O)C2CC34OC5(O)C(CC(O)C3C12O)C4(C)CCC5OC(=O)C(C)(O)C(C)OC(C)=O	CPINTEKYWNYXNP-UHFFFAOYSA-N	0.010313	4.48657	1144.51	8375.62	blue	Steroids and steroid derivatives
negative	M60_R846_581	14.097	59.9835	60.9926	[M-H]-	Hydrogen carbonate	CH2O3	OC([O-])=O	BVKZGUZCCUSVTD-UHFFFAOYSA-M	0.0834729	0.550338	21777.8	12084.1	common	Others
negative	M587_R450_23050	7.499	587.426	542.434	[M+HCOOH-H]-	FAHFA 35:5	C35H58O4	CCCC\C=C/C\C=C/CCCCCCCC(=O)OC(CCCCCCC(O)=O)\C=C/C\C=C/C\C=C/CC	AFGIAIRZEKZJJU-KBFDWMJRSA-N	0.0736904	0.105081	67.2676	0	common	Others
negative	M562_R427_21994	7.115	562.302	517.317	[M+HCOOH-H]-	LPC 18:3	C26H48NO7P	CC\C=C/C\C=C/C\C=C/CCCCCCCC(=O)OCC(O)COP([O-])(=O)OCC[N+](C)(C)C	WKQNRCYKYCKESD-QNEBEIHSSA-N	0.981478	1.02358	281.544	4499.23	common	Organoheterocyclic compounds
negative	M291_R467_9608	7.791	291.189	310.214	[M-H2O-H]-	Massbank:PR309085 FA 18:3+2O	C18H30O4	O=C(O)CCCCCCCC1OC1(C=CC(=O)CCCCC)	BJIKXWWZEPAKQC-UHFFFAOYSA-N	0.178259	0.229255	1508.26	566.572	common	Fatty Acyls
negative	M407_R515_15110	8.591	407.212	408.228	[M-H]-	LPA 16:1	C19H37O7P	CCCCCC\C=C/CCCCCCCC(=O)OCC(O)COP(O)(O)=O	GLGQZYWTNAOWHT-FPLPWBNLSA-N	0.239255	0.211829	648.823	41.7778	common	Glycerophospholipids
negative	M431_R471_16171	7.842	431.211	432.228	[M-H]-	LPA 18:3	C21H37O7P	CC\C=C/C\C=C/C\C=C/CCCCCCCC(=O)OCC(O)COP(O)(O)=O	DVNZKWQUAXJYGB-PDBXOOCHSA-N	0.798452	0.802142	5618.31	3340.46	common	Glycerophospholipids
negative	M449_R405_17063	6.754	449.219	414.238	[M+Cl]-	LPG O-12:0	C18H39O8P	CCCCCCCCCCCCOCC(O)COP(O)(=O)OCC(O)CO	ITJYUJNQNVNGTF-UHFFFAOYNA-N	0.155749	2.40257	142.258	3156.74	common	Glycerophospholipids
negative	M464_R250_17725	4.162	464.085	611.161	[M-C6H10O4-H]-	Delphinidin-3-O-(6''-O-alpha-rhamnopyranosyl-beta-glucopyranoside)	[C27H31O16]+	C(C5O)(O)C(C)OC(C5O)OCC(O1)C(C(C(C1Oc(c3)c([o+1]c(c4)c(c(O)cc4O)3)c(c2)cc(c(c2O)O)O)O)O)O	PLKUTZNSKRWCCA-LTSKFBHWSA-O	0.126491	7.66914	1087.97	4838.62	common	Flavonoids
negative	M464_R365_17727	6.085	464.099	611.161	[M-C6H10O4-H]-	Massbank:PR100917 Cyanidin-3-O-(2''-O-beta-glucopyranosyl-beta-glucopyranoside)|Cy 3-Soph|cyanidin-3-sophoroside	C27H31O16+	c(c(c([o+1]4)c(cc(c(O)5)c(cc(O)c5)4)OC(O2)C(OC(O3)C(C(C(C3CO)O)O)O)C(C(C2CO)O)O)1)c(O)c(O)cc1	SXYMMDGPXYVCER-WGNLCONDSA-O	0.0876993	0.409922	1532.91	304.37	common	Flavonoids
negative	M540_R466_21095	7.77	540.317	495.332	[M+HCOOH-H]-	1-Hexadecanoyl-sn-glycero-3-phosphocholine	C24H50NO7P	CCCCCCCCCCCCCCCC(=O)OCC(COP(=O)([O-])OCC[N+](C)(C)C)O	ASWBNKHCZGQVJV-UHFFFAOYSA-N	0.628675	1.44831	663.495	13101.9	common	Glycerophospholipids
negative	M481_R492_18523	8.205	481.247	482.264	[M-H]-	LPG 16:1	C22H43O9P	CCCCCC\C=C/CCCCCCCC(=O)OCC(O)COP(O)(=O)OCC(O)CO	JSKJPUCKVIJTKI-FPLPWBNLSA-N	0.495605	0.479261	1632.12	618.481	common	Glycerophospholipids
negative	M502_R427_19399	7.118	502.282	467.301	[M+Cl]-	LysoPC(14:0)	C22H47NO7P	[H][C@@](O)(COC(=O)CCCCCCCCCCCCC)COP([O-])(=O)OCC[N+](C)(C)C	VXUOFDJKYGDUJI-OAQYLSRUSA-N	0.488382	1.65259	156.982	7208.18	common	Glycerophospholipids
negative	M507_R492_19653	8.197	507.263	508.28	[M-H]-	LPG 18:2	C24H45O9P	CCCCC\C=C/C\C=C/CCCCCCCC(=O)OCC(O)COP(O)(=O)OCC(O)CO	VEEHTGYBVMTAAF-HZJYTTRNSA-N	0.679049	1.38252	574.542	947.454	common	Glycerophospholipids
negative	M571_R479_22359	7.988	571.278	572.287	[M-H]-	SMGDG O-10:0_6:0	C25H48O12S	CCCCCCCCCCOCC(COC1OC(CO)C(O)C(OS(O)(=O)=O)C1O)OC(=O)CCCCC	BLZPLJKUBDBHBD-UHFFFAOYNA-N	0.353566	2.48847	4255.59	3115.36	common	Others
negative	M593_R432_23267	7.203	593.259	594.271	[M-H]-	SMGDG O-16:3_2:0	C27H46O12S	CC\C=C/C\C=C/C\C=C/CCCCCCOCC(COC1OC(CO)C(O)C(OS(O)(=O)=O)C1O)OC(C)=O	YFIIVBVWZWAASX-YSTUJMKBNA-N	0.771805	1.26063	2385.62	4457	common	Glycerophospholipids
negative	M595_R460_23357	7.665	595.273	596.287	[M-H]-	SMGDG O-16:2_2:0	C27H48O12S	CCC\C=C/C\C=C/CCCCCCCCOCC(COC1OC(CO)C(O)C(OS(O)(=O)=O)C1O)OC(C)=O	GDNPKSRBFRVHSG-AFJQJTPPNA-N	0.420158	2.17857	966.492	2211.41	common	Glycerophospholipids
negative	M609_R210_24004	3.5	609.134	610.153	[M-H]-	CHEMBL1378766 CollisionEnergy:102040	C27H30O16	O=c1cc(-c2cc(O)c(O)c(C3OC(CO)C(O)C(O)C3O)c2)oc2cc(OC3OC(CO)C(O)C(O)C3O)cc(O)c12	JQFRAIFJNILXER-UHFFFAOYSA-N	0.26586	3.04061	1338.28	1335.93	common	Flavonoids
negative	M827_R555_33617	9.255	827.478	828.506	[M-H]-	SMGDG O-17:1_18:4	C44H76O12S	CCCCCCC\C=C/CCCCCCCCOCC(COC1OC(CO)C(O)C(OS(O)(=O)=O)C1O)OC(=O)CCCC\C=C/C\C=C/C\C=C/C\C=C/CC	QUAFEKMZRMHZNL-KTLFELONNA-N	0.241576	0.178716	34.5974	3.50544	common	Glycerophospholipids
negative	M671_R555_26941	9.255	671.456	672.473	[M-H]-	PA 34:2	C37H69O8P	CCCCCCC\C=C/CCCCCCCC(=O)OCC(COP(O)(O)=O)OC(=O)CCCCCCC\C=C/CCCCCCC	QMQJAUPVWBSPRD-IQRFGFHNSA-N	0.0568374	0.212724	8982.03	558.683	common	Glycerophospholipids
negative	M693_R583_28127	9.718	693.446	694.457	[M-H]-	PA(18:2(9Z,12Z)/18:3(6Z,9Z,12Z))	C39H67O8P	[H][C@@](COC(=O)CCCCCCC\C=C/C\C=C/CCCCC)(COP(O)(O)=O)OC(=O)CCCC\C=C/C\C=C/C\C=C/CCCCC	VKNJXYLLZUGTCV-ZVMKNGRMSA-N	0.093931	0.292806	2821.67	249.748	common	Glycerophospholipids
negative	M726_R521_29702	8.687	726.419	727.442	[M-H]-	PS 32:4	C38H66NO10P	CCCCCCCCCCCCCCCC(=O)OCC(COP(O)(=O)OCC(N)C(O)=O)OC(=O)CC\C=C/C\C=C/C\C=C/C\C=C/CC	RPHDQZBJXMLPFL-QLXZSTJSSA-N	0.533161	1.53398	307.227	602.117	common	Glycerophospholipids
negative	M837_R851_34064	14.179	837.464	838.49	[M-H]-	SMGDG O-16:3_20:4	C45H74O12S	CC\C=C/C\C=C/C\C=C/CCCCCCOCC(COC1OC(CO)C(O)C(OS(O)(=O)=O)C1O)OC(=O)CCCCCC\C=C/C\C=C/C\C=C/C\C=C/CC	BMZJXNFHDXOFKQ-INYVGQRMNA-N	0.220598	0.331273	3097.78	1089.66	common	Others
positive	M288_R304_14788	5.066	288.058	287.056	[M+H]+	Tricetanidin	C15H11O6	OC1=CC(O)=C2C=CC(=[O+]C2=C1)C1=CC(O)=C(O)C(O)=C1	CMPNIWQMRYYTMK-UHFFFAOYSA-O	0.489795	0.850968	2307.28	2056.65	common	Flavonoids
positive	M200_R380_7758	6.341	200.237	199.23	[M+H]+	N-Methyldodecylamine	C13H29N	CCCCCCCCCCCCNC	OMEMQVZNTDHENJ-UHFFFAOYSA-N	0.108752	1.18196	1040.67	1126.59	common	Others
positive	M124_R852_3859	14.198	124.086	123.08	[M+H]+	3,3'-Iminobispropanenitrile	C6H9N3	N#CCCNCCC#N	SBAJRGRUGUQKAF-UHFFFAOYSA-N	0.858359	0.965171	149.609	142.937	common	Others
positive	M289_R300_14909	4.999	289.07	288.063	[M+H]+	CHEMBL1565874 CollisionEnergy:205060	C15H12O6	O=C1c2cc(O)cc(O)c2OCC1c1ccc(O)c(O)c1	PTKYBKZGMPXIQK-UHFFFAOYSA-N	0.00501716	5.32782	763.073	4360.03	blue	Flavonoids
positive	M466_R232_34393	3.87	466.107	465.103	[M+H]+	Massbank:PR303725 Delphinidin 3-galactoside	C21H21O12+	OCC1OC(OC2=C([O+]=C3C=C(O)C=C(O)C3=C2)C2=CC(O)=C(O)C(O)=C2)C(O)C(O)C1O	XENHPQQLDPAYIJ-UHFFFAOYSA-O	0.00214004	2.36349	644.965	1713.47	blue	Flavonoids
positive	M304_R233_16645	3.881	304.048	303.05	[M+H]+	Delphinidin	C15H11O7	OC1=CC2=[O+]C(=C(O)C=C2C(O)=C1)C1=CC(O)=C(O)C(O)=C1	JKHRCGUTYDNCLE-UHFFFAOYSA-O	0.00889657	1.85504	4061.17	7102	blue	Flavonoids
positive	M333_R283_19820	4.71	333.093	332.092	[M+H]+	Sanguinarine	C20H14NO4+	O1C=2C=CC3=C4C=CC=5C=C6OCOC6=CC5C4=[N+](C=C3C2OC1)C	INVGWHRKADIJHF-UHFFFAOYSA-N	0.979891	0.985711	6065.01	2961.55	common	Alkaloids
positive	M342_R221_20855	3.688	342.132	341.112	[M+H]+	1,N6-Benzoquinone-deoxyadenosine	C16H15N5O4	O[C@H]1C[C@H](N2C=NC3=C2N=CN2C3=NC3=C2C=CC(O)=C3)O[C@@H]1CO	MBCUHHVOLCNSQP-YNEHKIRRSA-N	0.171728	6.87516	386.211	2154.02	common	Others
positive	M699_R423_56979	7.045	699.345	676.367	[M+Na]+	DGDG O-16:3_2:0	C33H56O14	CC\C=C/C\C=C/C\C=C/CCCCCCOCC(COC1OC(COC2OC(CO)C(O)C(O)C2O)C(O)C(O)C1O)OC(C)=O	NOQHPMYGFZQXRF-YSTUJMKBNA-N	0.0405939	1.95644	2356.13	4766.62	blue	Glycerophospholipids
positive	M496_R460_37007	7.662	496.343	495.332	[M+H]+	LPC 16:0-SN2	C24H50NO7P	CCCCCCCCCCCCCCCC(=O)OCC(O)COP([O-])(=O)OCC[N+](C)(C)C	ASWBNKHCZGQVJV-UHFFFAOYNA-N	0.61854	1.4315	479.591	11496.6	common	Glycerophospholipids
positive	M496_R468_37008	7.798	496.343	495.332	[M+H]+	Spectral Match to Lyso-PC(16:0) from NIST14	C24H50NO7P	CCCCCCCCCCCCCCCC(=O)OC[C@H](COP(=O)([O-])OCC[N+](C)(C)C)O	ASWBNKHCZGQVJV-HSZRJFAPSA-N	0.338551	1.71808	6157.94	98564.5	common	Glycerophospholipids
positive	M497_R459_37106	7.657	497.341	474.335	[M+Na]+	DG 26:5	C29H46O5	CCCCCCCC(=O)OCC(CO)OC(=O)C\C=C/C\C=C/C\C=C/C\C=C/C\C=C/CC	LFQQBMCSQGTBCP-NLKJXZCKNA-N	0.316245	1.85674	68.2313	2220.39	common	Glycerophospholipids
positive	M497_R469_37107	7.809	497.343	479.301	[M+NH4]+	LPC 15:1	C23H46NO7P	CCCCC\C=C/CCCCCCCC(=O)OCC(O)COP([O-])(=O)OCC[N+](C)(C)C	SUCJIOBGMPMVBJ-KTKRTIGZSA-N	0.190199	2.07196	925.633	16415.6	common	Organoheterocyclic compounds
positive	M505_R200_37910	3.341	505.186	482.183	[M+Na]+	"11-(6-{[2-(3,4-dimethoxyphenyl)ethyl]amino}-4-chloro-1,3,5-triazin-2-yl)-7,11- diazatricyclo[7.3.1.0<2,7>]trideca-2,4-dien-6-one CollisionEnergy:102040"	C24H27ClN6O3	COc1ccc(CCN=c2nc(Cl)nc(N3CC4CC(C3)c3cccc(=O)n3C4)[nH]2)cc1OC	DRVRFMGQMHIZLI-UHFFFAOYSA-N	0.100199	6.76204	247.496	1787.03	common	Others
positive	M510_R492_38482	8.196	510.359	509.335	[M+H]+	LDGCC 18:4	C28H47NO7	CC\C=C/C\C=C/C\C=C/C\C=C/CCCCC(=O)OCC(O)COC(OCC[N+](C)(C)C)C([O-])=O	NSWBOGPWADPUNN-DOFZRALJNA-N	0.375585	1.79179	52.8097	1664.87	common	Organoheterocyclic compounds
positive	M512_R259_38669	4.322	512.32	489.345	[M+Na]+	Pro-CDCA	C29H47NO5	C[C@H](CCC(N1C(C(O)=O)CCC1)=O)[C@H]2CC[C@@]3([H])[C@]4([H])[C@H](O)C[C@]5([H])C[C@H](O)CC[C@]5(C)[C@H]4CC[C@@]32C	TVNLAWCTCXPKQY-AVINCHNBSA-N	0.0906468	2.20554	1212.32	3193.06	common	Steroids and steroid derivatives
positive	M512_R264_38670	4.408	512.32	489.345	[M+Na]+	Pro-HDCA	C29H47NO5	C[C@H](CCC(N1C(C(O)=O)CCC1)=O)[C@H]2CC[C@@]3([H])[C@]4([H])C[C@H](O)[C@]5([H])C[C@H](O)CC[C@]5(C)[C@H]4CC[C@@]32C	CBUDWRGEUSIPLO-OPPBNAOESA-N	0.00138423	75.7109	74.444	7115.27	blue	Steroids and steroid derivatives
positive	M500_R422_37371	7.033	500.309	477.322	[M+Na]+	LPC O-16:2	C24H48NO6P	CCC\C=C/C\C=C/CCCCCCCCOCC(O)COP([O-])(=O)OCC[N+](C)(C)C	GKZBGTBDMLFIEV-NQLNTKRDNA-N	0.354004	2.28121	4.26675	35.8323	common	Organoheterocyclic compounds
positive	M518_R422_39166	7.033	518.327	517.317	[M+H]+	LysoPC(18:3(6Z,9Z,12Z)/0:0)	C26H48NO7P	[H][C@@](O)(COC(=O)CCCC\C=C/C\C=C/C\C=C/CCCCC)COP([O-])(=O)OCC[N+](C)(C)C	MRTUWVDDQVMUCR-ACHCNROVSA-N	0.806695	1.24482	370.54	14267.3	common	Organoheterocyclic compounds
positive	M518_R429_39168	7.145	518.328	517.317	[M+H]+	LPC 18:3-SN1	C26H48NO7P	CC\C=C/C\C=C/C\C=C/CCCCCCCC(=O)OCC(O)COP([O-])(=O)OCC[N+](C)(C)C	WKQNRCYKYCKESD-QNEBEIHSNA-N	0.55006	1.57485	878.913	60508.2	common	Organoheterocyclic compounds
positive	M522_R480_39624	8.002	522.358	521.348	[M+H]+	Spectral Match to 1-(9Z-Octadecenoyl)-sn-glycero-3-phosphocholine from NIST14	C26H52NO7P	CCCCCCCC/C=C\CCCCCCCC(=O)OC[C@H](COP(=O)([O-])OCC[N+](C)(C)C)O	YAMUFBLWGFFICM-PTGWMXDISA-N	0.729398	0.725775	400.58	5526.49	common	Organoheterocyclic compounds
positive	M524_R511_39862	8.513	524.368	523.364	[M+H]+	PC 18:0e	C26H54NO7P	CCCCCCCCCCCCCCOCC(COP([O-])(=O)OCC[N+](C)(C)C)OC(=O)CCC	HBDDPDCWQRQTDQ-UHFFFAOYSA-N	0.113823	2.85351	100.718	1070.26	common	Glycerophospholipids
positive	M524_R516_39863	8.607	524.37	523.364	[M+H]+	LysoPC(0:0/18:0)	C26H54NO7P	[H][C@@](CO)(COP([O-])(=O)OCC[N+](C)(C)C)OC(=O)CCCCCCCCCCCCCCCCC	IQGPMZRCLCCXAG-RUZDIDTESA-N	0.278349	1.96982	601.112	11296.7	common	Glycerophospholipids
positive	M525_R356_39967	5.929	525.131	502.153	[M+Na]+	"N-[4-((1E)-3-oxo-3-phenylprop-1-enyl)phenyl][2-(2-methoxyphenyl)-1,3-dioxobenz o[c]azolin-5-yl]carboxamide CollisionEnergy:102040"	C31H22N2O5	COc1ccccc1N1C(=O)c2ccc(C(=O)Nc3ccc(C=CC(=O)c4ccccc4)cc3)cc2C1=O	SBJJDACRXMEUBL-UHFFFAOYSA-N	0.0162155	5.90796	378.856	2469.58	blue	Others
positive	M525_R517_40005	8.616	525.373	507.332	[M+NH4]+	PC 17:1e	C25H50NO7P	CCCC\C=C/CCCCCCCCOCC(COP([O-])(=O)OCC[N+](C)(C)C)OC(=O)CC	USTMOQWMKSBKBC-KHPPLWFESA-N	0.278705	2.04782	188.843	1791.25	common	Organoheterocyclic compounds
positive	M542_R255_42170	4.256	542.328	541.317	[M+H]+	LysoPC(20:5(5Z,8Z,11Z,14Z,17Z)/0:0)	C28H48NO7P	[H][C@@](O)(COC(=O)CCC\C=C/C\C=C/C\C=C/C\C=C/C\C=C/CC)COP([O-])(=O)OCC[N+](C)(C)C	PDIGSOAOQOXRDU-WJPZTBRDSA-N	0.00887388	125.083	74.3363	10050.8	blue	Organoheterocyclic compounds
positive	M573_R500_45223	8.326	573.486	572.48	[M+H]+	lithocholic acid-C13:0	C37H64O4	CC12C(CCC2C(CCC(O)=O)C)C3CCC4CC(OC(CCCCCCCCCCCC)=O)CCC4(C)C3CC1	DUBWLGQGZGZQPM-UHFFFAOYSA-N	0.0198604	0.253068	3585.49	282.492	yellow	Others
positive	M594_R597_47185	9.947	594.277	593.263	[M+H]+	Afidopyropen	C33H39NO9	CC12CCC(C(C1CC(C3(C2C(C4=C(O3)C=C(OC4=O)C5=CN=CC=C5)O)C)O)(C)COC(=O)C6CC6)OC(=O)C7CC7	LRZWFURXIMFONG-UHFFFAOYSA-N	0.12829	0.613989	19301.2	9828.57	common	Others
positive	M600_R852_47794	14.204	599.507	598.496	[M+H]+	lithocholic acid-C15:1	C39H66O4	O=C(OC1CC(CCC2C3CCC4(C)C2CCC4C(CCC(O)=O)C)C3(C)CC1)CCCCCCCCC=CCCCC	HPCYBASHKWCYBA-UHFFFAOYSA-N	0.178094	0.495148	2070.68	962.857	common	Others
positive	M609_R495_48916	8.247	609.454	586.46	[M+Na]+	TG O-18:5_8:0_8:0	C37H62O5	CCCCCCCC(=O)OCC(COCC\C=C/C\C=C/C\C=C/C\C=C/C\C=C/CC)OC(=O)CCCCCCC	XQYQXAVDBLMKRM-YCMXFXIZNA-N	0.272381	0.369998	2904.8	1826.9	common	Glycerophospholipids
positive	M611_R570_49134	9.496	611.466	588.475	[M+Na]+	TG O-8:0_8:0_18:4	C37H64O5	CCCCCCCCOCC(COC(=O)CCCC\C=C/C\C=C/C\C=C/C\C=C/CC)OC(=O)CCCCCCC	UIVWUZHXXWKKHR-AMMHHEAINA-N	0.0418105	2.0215	9039.56	22160.9	blue	Glycerophospholipids
positive	M757_R853_60956	14.212	756.554	755.547	[M+H]+	PC 34:3	C42H78NO8P	CCCCCCCCCCCC(=O)OCC(COP([O-])(=O)OCC[N+](C)(C)C)OC(=O)CCCCCCCC\C=C/C\C=C/C\C=C/CCCCC	KYRRDNSYOZCTFM-AENYGSQQSA-N	0.561917	0.672886	24861	741.06	common	Glycerophospholipids
positive	M759_R488_61170	8.14	758.57	757.562	[M+H]+	1-palmitoyl-2-linoleoyl-phosphatidylcholine	C42H81NO8P	CCCCCCCCCCCCCCCC(=O)OC[C@]([H])(COP([O-])(=O)OCC[N+](C)(C)C)OC(=O)CCCCCCC\C=C/C\C=C/CCCCC	JLPULHDHAOZNQI-ZTIMHPMXSA-N	0.35902	0.525177	2071.43	754.187	common	Glycerophospholipids
positive	M760_R853_61260	14.211	759.577	736.564	[M+Na]+	TAG 44:7	C47H76O6	CCCCCCCC\C=C/CCCCCC(=O)OCC(COC(=O)CCC\C=C/C\C=C/C\C=C/CC)OC(=O)CCC\C=C/C\C=C/C\C=C/CC	CURKLWGIUJQGGH-TWYMBPLSSA-N	0.234261	0.431069	4398.13	1015.54	common	Glycerophospholipids
positive	M779_R853_62635	14.215	778.544	777.531	[M+H]+	1-18:3-2-18:3-phosphatidylcholine	C44H77NO8P	CC\C=C/C\C=C/C\C=C/CCCCCCCC(=O)OC[C@]([H])(COP([O-])(=O)OCC[N+](C)(C)C)OC(=O)CCCCCCC\C=C/C\C=C/C\C=C/CC	XXKFQTJOJZELMD-JICBSJGISA-N	0.63465	1.46959	6353.12	5541.09	common	Glycerophospholipids
positive	M780_R852_62718	14.207	779.538	756.521	[M+Na]+	SM 39:9;2O	C44H73N2O6P	CCCC\C=C\C(O)C(COP([O-])(=O)OCC[N+](C)(C)C)NC(=O)CCCC\C=C/C\C=C/C\C=C/C\C=C/C\C=C/C\C=C/C\C=C/C\C=C/CC	BSFKEYYPRNTWGC-RYBAHAAYNA-N	0.548129	1.6351	1221.68	1770.02	common	Others
positive	M781_R853_62795	14.213	780.55	779.547	[M+H]+	1-18:2-2-18:3-phosphatidylcholine	C44H79NO8P	CCCCC\C=C/C\C=C/CCCCCCCC(=O)OC[C@]([H])(COP([O-])(=O)OCC[N+](C)(C)C)OC(=O)CCCCCCC\C=C/C\C=C/C\C=C/CC	HZGAVPNEGHQJID-UNBCHYIMSA-N	0.232238	3.61992	2539.82	5172.02	common	Glycerophospholipids
positive	M783_R852_62984	14.207	782.563	781.562	[M+H]+	1-18:2-2-18:2-sn-glycerol-3-phosphocholine	C44H81NO8P	CCCCC\C=C/C\C=C/CCCCCCCC(=O)OC[C@]([H])(COP([O-])(=O)OCC[N+](C)(C)C)OC(=O)CCCCCCC\C=C/C\C=C/CCCCC	FVXDQWZBHIXIEJ-LNDKUQBDSA-N	0.278413	2.24551	13139.1	18676.3	common	Glycerophospholipids
positive	M783_R499_62986	8.317	782.566	781.562	[M+H]+	1-hexadecanoyl-2--(5Z,8Z,11Z,14Z-eicosatetraenoyl)-sn-glycero-3-phosphocholine	C44H80NO8P	CCCCCCCCCCCCCCCC(=O)OC[C@H](COP(=O)([O-])OCC[N+](C)(C)C)OC(=O)CCC/C=C\C/C=C\C/C=C\C/C=C\CCCCC	IIZPXYDJLKNOIY-JXPKJXOSSA-N	0.441689	2.06497	2083.76	2554.1	common	Glycerophospholipids
positive	M784_R852_63076	14.208	783.562	760.598	[M+Na]+	PA(20:0/20:0)	C43H85O8P	[H][C@@](COC(=O)CCCCCCCCCCCCCCCCCCC)(COP(O)(O)=O)OC(=O)CCCCCCCCCCCCCCCCCCC	AVCNPSVOTIQNBF-VQJSHJPSSA-N	0.195605	3.45749	1510.02	4788.7	common	Glycerophospholipids
positive	M805_R854_64687	14.228	804.543	781.562	[M+Na]+	1-18:1-2-18:3-phosphatidylcholine	C44H81NO8P	CCCCCCCC\C=C/CCCCCCCC(=O)OC[C@]([H])(COP([O-])(=O)OCC[N+](C)(C)C)OC(=O)CCCCCCC\C=C/C\C=C/C\C=C/CC	FVQGNFUBHWGFCY-HJOYQDMMSA-N	0.182695	2.41559	536.695	1474.22	common	Glycerophospholipids
positive	M886_R851_69236	14.179	885.557	862.596	[M+Na]+	MGDG O-16:4_28:7	C53H82O9	CC\C=C/C\C=C/C\C=C/C\C=C/CCCOCC(COC1OC(CO)C(O)C(O)C1O)OC(=O)CCCCC\C=C/C\C=C/C\C=C/C\C=C/C\C=C/C\C=C/C\C=C/CC	YGTNSVBFLJVZEK-AUVYPVGQNA-N	0.820751	0.881909	5877.93	8565.13	common	Others
positive	M967_R393_72956	6.558	966.544	983.545	[M+H-H2O]+	Hex3Cer 16:3;2O/16:4	C50H81NO18	CCC\C=C\CC\C=C\CC\C=C\C(O)C(COC1OC(CO)C(OC2OC(CO)C(OC3OC(CO)C(O)C(O)C3O)C(O)C2O)C(O)C1O)NC(=O)CC\C=C/C\C=C/C\C=C/C\C=C/CC	GITNPKMQKRXHRK-PGPWZNQFNA-N	0.342372	0.426511	1631.28	1038.57	common	Others
